# Supplementary material for: Quantification of protein isoforms in mesenchymal stem cells by reductive dimethylation of lysines in intact proteins
Source: PubMed Central journal article supplement (PMC3440571; doi:10.1002/pmic.201100308), 2012-01-13
Supplement: pmic0012-0369-SD1.pdf [file pmic0012-0369-SD1.pdf]

**Table S1. Observation of the Dimethylated Peptides from Trypsin-digested Bovine Apotransferrin**

| RT (min) | m/z (Obs.)     | Mr(Expt)  | Mr(Calc.) | ppm | Score | Position | Peptide Sequence                                                                              | Intensity (TIC) |         |                                                                                         |
|----------|----------------|-----------|-----------|-----|-------|----------|-----------------------------------------------------------------------------------------------|-----------------|---------|-----------------------------------------------------------------------------------------|
| 8.98     | 492.5686 (3+)  | 1474.6840 | 1474.6834 | 1   | 20    | 527-539  | K.GTGK <del>K</del> ECVPNSNER.Y Dimethyl (K4)                                                 | 3 %             |         |                                                                                         |
|          | 494.5811 (3+)  | 1480.7215 | 1480.7211 | 0   |       |          |                                                                                               |                 |         |                                                                                         |
|          | 738.3500 (2+)  | 1474.6854 | 1474.6834 | 1   | 47    |          |                                                                                               |                 |         |                                                                                         |
|          | 741.3688 (2+)  | 1480.7230 | 1480.7211 | 1   | 52    |          |                                                                                               |                 |         |                                                                                         |
| 9.41     | 628.8489 (2+)  | 1255.6832 | 1255.6819 | 1   | 25    | 132-142  | R.G <del>K</del> K <del>K</del> SCHTGLGR.S Dimethyl (K2,K3)                                   | 8%              |         |                                                                                         |
|          | 634.8858 (2+)  | 1267.7570 | 1267.7572 | 0   | 28    |          |                                                                                               |                 |         |                                                                                         |
| 9.48     | 513.5967 (3+)  | 1537.7683 | 1537.7671 | 1   | 67    | 595-607  | R. <del>K</del> PVTD AENCHLAR.G Dimethyl (K1)                                                 | 22%             |         |                                                                                         |
|          | 515.6092 (3+)  | 1543.8058 | 1543.8047 | 1   | 79    |          |                                                                                               |                 |         |                                                                                         |
|          | 769.8920 (2+)  | 1537.7694 | 1737.7671 | 2   | 64    |          |                                                                                               |                 |         |                                                                                         |
|          | 772.9104 (2+)  | 1543.8062 | 1543.8047 | 1   | 68    |          |                                                                                               |                 |         |                                                                                         |
| 10.33    | 315.6827 (2+)  | 629.3498  | 629.3497  | 0   | 47    | 43-47    | R. ENVLR.I lysine-free peptide                                                                | 2%              |         |                                                                                         |
| 12.00    | 353.1896 (2+)  | 704.3646  | 704.3639  | 1   | 39    | 683-688  | R. AMTNLR.Q lysine-free peptide                                                               | 7%              |         |                                                                                         |
| 13.86    | 625.3269 (2+)  | 1248.6392 | 1248.6384 | 1   | 46    | 659-669  | R. DDT <del>K</del> CLASIAK.K Dimethyl (K4)                                                   | 3%              |         |                                                                                         |
|          | 628.3457 (2+)  | 1254.6768 | 1254.6760 | 1   | 42    |          |                                                                                               |                 |         |                                                                                         |
| 14.27    | 826.4276 (2+)  | 1650.8406 | 1650.8399 | 0   | 65    | 582-594  | K. <del>K</del> ENFEVLC <del>K</del> DGTR.K 2 Dimethyl (K1, K9)                               | 2%              |         |                                                                                         |
|          | 832.4654 (2+)  | 1662.9162 | 1662.9152 | 1   | 61    |          |                                                                                               |                 |         |                                                                                         |
| 14.80    | 998.4618 (2+)  | 1994.9090 | 1994.9091 | 0   | 78    | 27-42    | R.WCTISTHEAN <del>K</del> CASFR.E Dimethyl (K11)                                              | 24%             |         |                                                                                         |
|          | 1001.4810 (2+) | 2000.9474 | 2000.9467 | 0   | 83    |          |                                                                                               |                 |         |                                                                                         |
|          | 665.9775 (3+)  | 1994.9107 | 1994.9091 | 1   | 41    |          |                                                                                               |                 |         |                                                                                         |
|          | 667.9898 (3+)  | 2000.9476 | 2000.9467 | 0   | 32    |          |                                                                                               |                 |         |                                                                                         |
| 15.70    | 468.7545 (2+)  | 935.4944  | 935.4937  | 1   | 67    | 608-616  | R.GPNHAVVSR.K lysine-free peptide                                                             | 16%             |         |                                                                                         |
| 16.31    | 740.3535 (4+)  | 2957.3849 | 2957.3833 | 1   | 32    | 351-374  | R.ES <del>K</del> PPDSS <del>K</del> DECMV <del>K</del> WCAIGHQER.T 3 Dimethyl (K3, K9, K15 ) | 5%              |         |                                                                                         |
|          | 744.8819 (4+)  | 2975.4963 | 2975.4963 | 0   |       |          |                                                                                               |                 |         |                                                                                         |
|          | 986.8016 (3+)  | 2957.3830 | 2957.3833 | 0   | 57    |          |                                                                                               |                 |         |                                                                                         |
|          | 992.8395 (3+)  | 2975.4950 | 2975.4963 | 0   | 53    |          |                                                                                               |                 |         |                                                                                         |
| 17.40    | 504.2490 (3+)  | 1509.7252 | 1509.7245 | 0   | 37    | 244-255  | R. <del>K</del> NYELLCGDNTR.K Dimethyl (K1)                                                   | 15%             |         |                                                                                         |
|          | 506.2617 (3+)  | 1515.7633 | 1515.7622 | 1   | 34    |          |                                                                                               |                 |         |                                                                                         |
|          | 755.8698 (2+)  | 1509.7250 | 1509.7245 | 0   | 60    |          |                                                                                               |                 |         |                                                                                         |
|          | 758.8888 (2+)  | 1515.7630 | 1515.7622 | 1   | 73    |          |                                                                                               |                 |         |                                                                                         |
|          | 981.9932 (2+)  | 1961.9718 | 1961.9703 | 1   | 40    |          |                                                                                               |                 | 689-704 | R.QCSTS <del>K</del> LLEACTFH <del>K</del> P.- (protein C-terminus) 2Dimethyl (K6, K15) |
|          | 988.0308 (2+)  | 1974.0470 | 1974.0456 | 1   | 51    |          |                                                                                               |                 |         |                                                                                         |
|          | 654.9978 (3+)  | 1961.9716 | 1961.9703 | 1   | 49    |          |                                                                                               |                 |         |                                                                                         |
|          | 659.0233 (3+)  | 1974.0481 | 1974.0456 | 1   | 52    |          |                                                                                               |                 |         |                                                                                         |

|       |                |           |           |    |    |         |                                                                                                 |      |         |                                                 |    |
|-------|----------------|-----------|-----------|----|----|---------|-------------------------------------------------------------------------------------------------|------|---------|-------------------------------------------------|----|
| 18.32 | 549.2564 (2+)  | 1096.4982 | 1096.4978 | 0  | 55 | 540-548 | R.YYGYTGAFR.C lysine-free peptide                                                               | 100% |         |                                                 |    |
| 19.99 | 649.3218 (3+)  | 1944.9436 | 1944.9438 | 0  | 57 | 689-704 | R.QCSTS <b>K</b> LLEACTFH <b>K</b> P. - (protein C-terminus) Gln->pyro-Glu, 2Dimethyl (K6, K15) | 25%  |         |                                                 |    |
|       | 653.3447 (3+)  | 1957.0123 | 1957.0191 | 3  | 45 |         |                                                                                                 |      |         |                                                 |    |
| 20.70 | 707.6260 (4+)  | 2826.4749 | 2826.4738 | 0  | 38 | 143-166 | R.SAGWNIPMA <b>K</b> LY <b>K</b> ELPDPQESIQR.A 2 Dimethyl (K10, K13)                            | 22%  |         |                                                 |    |
|       | 710.6551 (4+)  | 2838.5913 | 2838.5892 | 1  | 41 |         |                                                                                                 |      |         |                                                 |    |
|       | 943.1660 (3+)  | 2826.4763 | 2826.4738 | 1  | 37 |         |                                                                                                 |      |         |                                                 |    |
|       | 947.2046 (3+)  | 2838.5920 | 2838.5892 | 1  | 35 |         |                                                                                                 |      |         |                                                 |    |
| 22.82 | 642.3160 (4+)  | 2565.2349 | 2565.2356 | 0  | 70 | 256-277 | R. <b>K</b> SVDDYQECYLAMVPSHAVVAR.T Dimethyl (K1)                                               | 48%  |         |                                                 |    |
|       | 643.8256 (4+)  | 2571.2733 | 2571.2732 | 0  | 69 |         |                                                                                                 |      |         |                                                 |    |
|       | 856.0859 (3+)  | 2565.2359 | 2565.2356 | 0  | 65 |         |                                                                                                 |      |         |                                                 |    |
|       | 858.0988 (3+)  | 2571.2746 | 2571.2732 | 1  | 56 |         |                                                                                                 |      |         |                                                 |    |
| 23.52 | 768.0180 (3+)  | 2301.0322 | 2301.0307 | 1  | 50 | 494-513 | K.INNC <b>K</b> FDEFFSAGCAPGSPR.T Dimethyl (K5)                                                 | 11%  |         |                                                 |    |
|       | 770.0304 (3+)  | 2307.0694 | 2307.0683 | 0  | 70 |         |                                                                                                 |      |         |                                                 |    |
| 24.53 | 798.7391 (3+)  | 2393.1955 | 2393.1937 | 1  | 42 | 663-682 | K.CLASIA <b>K</b> KTYDSYLGDDYVR.A 2 Dimethyl (K7, K8)                                           | 2%   |         |                                                 |    |
|       | 802.7641 (3+)  | 2405.2705 | 2405.2690 | 1  | 39 |         |                                                                                                 |      |         |                                                 |    |
|       | 599.3049 (4+)  | 2393.1905 | 2393.1937 | -1 | 36 |         |                                                                                                 |      |         |                                                 |    |
|       | 602.3250 (4+)  | 2405.2709 | 2405.2690 | 1  | 44 |         |                                                                                                 |      |         |                                                 |    |
| 26.23 | 1016.1520 (3+) | 3045.4342 | 3045.4324 | 1  | 90 | 217-243 | K.CLMEGAGDVAFV <b>K</b> HSTVFDNLPNPEDR.K Dimethyl (K13)                                         | 10%  |         |                                                 |    |
|       | 1018.1650 (3+) | 3051.4732 | 3051.4701 | 1  | 75 |         |                                                                                                 |      |         |                                                 |    |
|       | 762.3657 (4+)  | 3045.4337 | 3045.4324 | 0  | 41 |         |                                                                                                 |      |         |                                                 |    |
|       | 763.8757 (4+)  | 3051.4737 | 3051.4701 | 1  |    |         |                                                                                                 |      |         |                                                 |    |
| 27.24 | 961.1479 (3+)  | 2880.4219 | 2880.4215 | 0  | 31 | 659-682 | R.DDT <b>K</b> CLASIA <b>K</b> KTYDSYLGDDYVR.A 3 Dimethyl (K4, K11,K12)                         | 38%  |         |                                                 |    |
|       | 967.1859 (3+)  | 2898.5352 | 2898.5345 | 0  | 41 |         |                                                                                                 |      |         |                                                 |    |
|       | 721.1129 (4+)  | 2880.4203 | 2880.4215 | 0  | 35 |         |                                                                                                 |      |         |                                                 |    |
|       | 725.6413 (4+)  | 2898.5361 | 2898.5345 | 1  | 29 |         |                                                                                                 |      |         |                                                 |    |
| 29.62 | 879.1664 (4+)  | 3512.6365 | 3512.6341 | 1  | 33 | 630-658 | K.QQDDFG <b>K</b> SVTDCTSNFCLFQSN <b>K</b> DLLFR.D 2 Dimethyl (K7, K24)                         | 7%   |         |                                                 |    |
|       | 882.1851 (4+)  | 3524.7113 | 3524.7094 | 1  |    |         |                                                                                                 |      |         |                                                 |    |
|       | 889.7572 (3+)  | 2666.2498 | 2666.2469 | 1  | 57 | 637-658 | K.SVTDCTSNFCLFQSN <b>K</b> DLLFR.D Dimethyl (K17)                                               |      |         |                                                 |    |
|       | 891.7692 (3+)  | 2672.2858 | 2672.2845 | 0  |    |         |                                                                                                 |      |         |                                                 |    |
| 31.00 | 845.7714 (4+)  | 2534.2924 | 2534.2918 | 0  | 55 | 278-299 | R.TVGG <b>K</b> EDVIWELLNHAQEHEFGK.D Dimethyl (K5)                                              |      |         |                                                 |    |
|       | 847.7840 (4+)  | 2540.3302 | 2540.3294 | 0  | 56 |         |                                                                                                 |      |         |                                                 |    |
|       | 736.7152 (3+)  | 2207.1238 | 2207.1231 | 0  | 38 |         |                                                                                                 |      | 480-498 | R.TAGWNIPMGLLYS <b>K</b> INNCK.F Dimethyl (K14) | 1% |
|       | 738.7283 (3+)  | 2213.1614 | 2213.1607 | 0  |    |         |                                                                                                 |      |         |                                                 |    |
| 32.20 | 982.7827 (3+)  | 2945.3263 | 2945.3245 | 1  | 69 | 380-405 | R.WSGFSGGAIECETAENTEECIA <b>K</b> IMK.G Dimethyl (K23)                                          | 2%   |         |                                                 |    |
|       | 984.7953 (3+)  | 2951.3641 | 2951.3622 | 1  |    |         |                                                                                                 |      |         |                                                 |    |
| 35.07 | 966.2198 (4+)  | 3860.8501 | 3860.8477 | 1  | 37 | 480-513 | R.TAGWNIPMGLLYS <b>K</b> INN <b>K</b> FDEFFSAGCAPGSPR.N 2 Dimethyl (K14,K19)                    | 16%  |         |                                                 |    |
|       | 969.2382 (4+)  | 3872.9237 | 3872.9230 | 0  | 65 |         |                                                                                                 |      |         |                                                 |    |

**Table S2. List of High Abundance Peptides from a Tryptic Digest of Dimethylated Protein Mixture**

| RT (min) | m/z (Obs.)     | Mr(Expt)  | Mr(Calc.) | ppm | Score | Position | Peptide Sequence <sup>(*a)</sup>                                 | Intensity (TIC) |
|----------|----------------|-----------|-----------|-----|-------|----------|------------------------------------------------------------------|-----------------|
| 9.48     | 611.3202 (2+)  | 1220.6258 | 1220.6262 | 0   | 40    | 25-34    | R.DTHKSEIAHR.F Dimethyl (K4), albumin                            | 4%              |
|          | 614.3395 (2+)  | 1226.6644 | 1226.6638 | 1   | 43    |          |                                                                  |                 |
| 9.86     | 628.8489 (2+)  | 1255.6832 | 1255.6819 | 1   | 49    | 132-142  | R.GKKSCHTGLGR.S 2Dimethyl (K2,K3), apotransferrin                | 3%              |
|          | 634.8858 (2+)  | 1267.7570 | 1267.7572 | 0   | 50    |          |                                                                  |                 |
| 10.44    | 493.3114 (2+)  | 984.6082  | 984.6080  | 0   | 36    | 52-59    | R.TQINKVVR.F Dimethyl (K5), ovalbumin                            | 10%             |
|          | 496.3303 (2+)  | 990.6450  | 990.6456  | -1  | 41    |          |                                                                  |                 |
|          | 555.8170 (2+)  | 1109.6194 | 1109.6193 | 0   | 52    |          |                                                                  |                 |
|          | 558.8361 (2+)  | 1115.6576 | 1115.6569 | 1   | 46    |          |                                                                  |                 |
| 10.47    | 513.5967 (3+)  | 1537.7683 | 1537.7671 | 1   | 95    | 595-607  | R.KPVTDAENCHLAR Dimethyl (K1), apotransferrin                    | 11%             |
|          | 515.6089 (3+)  | 1543.8049 | 1543.8047 | 0   | 77    |          |                                                                  |                 |
|          | 769.8911 (2+)  | 1537.7676 | 1737.7671 | 0   | 66    |          |                                                                  |                 |
|          | 772.9097 (2+)  | 1543.8054 | 1543.8047 | 0   | 77    |          |                                                                  |                 |
| 10.82    | 569.3043 (2+)  | 1136.5940 | 1136.5933 | 1   | 56    | 220-229  | R.VASMASEKMK.I 2 Dimethyl (K8, K10) ; ovalbumin <sup>(*c)</sup>  | 4%              |
|          | 575.3421 (2+)  | 1148.6696 | 1148.6686 | 1   | 62    |          |                                                                  |                 |
| 10.94    | 641.2544 (1+)  | 640.2466  | -         | -   | -     | -        | Unknown singly charged ion peak <sup>(*b)</sup>                  | 6%              |
| 11.85    | 489.7374 (2+)  | 977.4592  | -         | -   | -     | -        | Unknown doubly charged ion peak <sup>(*b)</sup>                  | 8%              |
| 12.88    | 569.7529 (2+)  | 1137.4902 | -         | -   | -     | -        | Unknown doubly charged ion peak <sup>(*b)</sup>                  | 10%             |
| 13.75    | 612.3141 (2+)  | 1222.6136 | 1222.6128 | 1   | 41    | 223-232  | R.CASIQKFGER.A Dimethyl (K6), albumin                            | 8%              |
|          | 615.3330 (2+)  | 1228.6514 | 1228.6505 | 1   | 46    |          |                                                                  |                 |
| 13.96    | 539.2810 (2+)  | 1076.5474 | 1076.5470 | 0   | 41    | 24-32    | R.CELAAAMKR.H Dimethyl (K8), lysozyme                            | 5%              |
|          | 542.3002 (2+)  | 1082.5858 | 1082.5847 | 1   | 33    |          |                                                                  |                 |
| 14.56    | 515.7748 (2+)  | 1029.5350 | 1029.5342 | 1   | 38    | 28-36    | R.QSPVDIDTK.A Dimethyl (K9) carbonic anhydrase 2 <sup>(*c)</sup> | 1%              |
|          | 518.7935 (2+)  | 1035.5724 | 1035.5719 | 1   | 52    |          |                                                                  |                 |
| 14.94    | 715.9557 (3+)  | 2144.8453 | 2144.8449 | 0   | 21    | 106-122  | R.ETYGDMADCCEKQEPER.N Dimethyl (K12), albumin                    | 6%              |
|          | 717.9682 (3+)  | 2150.8828 | 2150.8825 | 0   | 22    |          |                                                                  |                 |
|          | 1073.4300 (2+) | 2144.8454 | 2144.8449 | 0   | 66    |          |                                                                  |                 |
|          | 1076.4490 (2+) | 2150.8834 | 2150.8825 | 0   | 68    |          |                                                                  |                 |
| 16.19    | 480.6089 (3+)  | 1438.8049 | 1438.8045 | 1   | 81    | 360-371  | R.RHPEYAVSVLLR.L albumin, lysine-free peptide                    | 10%             |
|          | 481.7789 (4+)  | 1923.0843 | 1923.0863 | -1  | 31    | 483-498  | R.LCVLHEKTPVSEKVTK.C 2 Dimethyl (K7,K13)                         |                 |
|          | 484.7981 (4+)  | 1935.1611 | 1935.1616 | 0   | 36    |          | albumin                                                          |                 |
|          | 642.0361 (3+)  | 1923.0865 | 1923.0863 | 0   | 40    |          |                                                                  |                 |
|          | 646.0613 (3+)  | 1935.1621 | 1935.1616 | 0   | 48    |          |                                                                  |                 |

|       |                |           |           |    |    |         |                                                                                                 |     |
|-------|----------------|-----------|-----------|----|----|---------|-------------------------------------------------------------------------------------------------|-----|
| 17.97 | 536.8661 (2+)  | 1071.7176 | 1071.7168 | 1  | 22 | 278-285 | R. <b>KIK</b> VYLPR.M 2 Dimethyl (K1,K3), ovalbumin                                             | 5%  |
|       | 542.9034 (2+)  | 1083.7922 | 1083.7921 | 0  | 27 |         |                                                                                                 |     |
| 18.29 | 504.2488 (3+)  | 1509.7246 | 1509.7245 | 0  | 46 | 244-255 | R. <b>K</b> NYELLCGDNTR.K Dimethyl (K1) apotransferrin                                          | 6%  |
|       | 506.2616 (3+)  | 1515.7630 | 1515.7622 | 1  | 44 |         |                                                                                                 |     |
|       | 755.8698 (2+)  | 1509.7250 | 1509.7245 | 0  | 76 |         |                                                                                                 |     |
|       | 758.8887 (2+)  | 1515.7628 | 1515.7622 | 0  | 73 |         |                                                                                                 |     |
|       | 515.3140 (2+)  | 1028.6134 | 1028.6131 | 0  | 54 | 233-241 | R.AL <b>K</b> AWSVAR.L Dimethyl (K3) albumin                                                    |     |
|       | 518.3329 (2+)  | 1034.6512 | 1034.6507 | 1  | 49 |         |                                                                                                 |     |
| 18.92 | 665.9775 (3+)  | 1994.9107 | 1994.9091 | 1  | 36 | 27-42   | R.WCTISTHEAN <b>K</b> CASFR.E Dimethyl (K11) apotransferrin                                     | 10% |
|       | 667.9897 (3+)  | 2000.9473 | 2000.9467 | 0  | 39 |         |                                                                                                 |     |
|       | 998.4620 (2+)  | 1994.9094 | 1994.9091 | 0  | 88 |         |                                                                                                 |     |
|       | 1001.4810 (2+) | 2000.9473 | 2000.9467 | 0  | 96 |         |                                                                                                 |     |
| 19.69 | 497.2036 (2+)  | 992.3926  | 992.3923  | 0  | 25 | 80-86   | R.WWCNDGR.T lysozyme C, lysine-free peptide                                                     | 16% |
| 20.50 | 499.2456 (3+)  | 1494.7153 | 1494.7137 | 1  | 20 | 583-594 | K.ENFEVLC <b>K</b> DGTR.K Dimethyl (K8), apotransferrin                                         | 12% |
|       | 501.2577 (3+)  | 1500.7496 | 1500.7513 | -1 | 23 |         |                                                                                                 |     |
|       | 748.3646 (2+)  | 1494.7146 | 1494.7137 | 1  | 50 |         |                                                                                                 |     |
|       | 751.3836 (2+)  | 1500.7526 | 1500.7513 | 1  | 51 |         |                                                                                                 |     |
| 21.34 | 768.6573 (4+)  | 3070.6001 | 3070.5977 | 1  | 33 | 483-507 | R.LCVLHE <b>K</b> TPVSE <b>K</b> VT <b>K</b> CCTESLVNR.R 3 Dimethyl (K7,K13,K16); albumin       | 8%  |
|       | 773.1849 (4+)  | 3088.7105 | 3088.7107 | 0  | 39 |         |                                                                                                 |     |
|       | 1024.5410 (3+) | 3070.6012 | 3070.5977 | 1  | 48 |         |                                                                                                 |     |
|       | 1030.5770 (3+) | 3088.7092 | 3088.7107 | 0  | 78 |         |                                                                                                 |     |
| 22.93 | 654.9975 (3+)  | 1961.9707 | 1961.9703 | 0  | 52 | 689-704 | R.QCSTS <b>K</b> LLEACTFH <b>K</b> P.- (protein C-terminus) 2Dimethyl (K6, K15), apotransferrin | 10% |
|       | 659.0228 (3+)  | 1974.0466 | 1974.0456 | 0  | 42 |         |                                                                                                 |     |
|       | 981.9924 (2+)  | 1961.9702 | 1961.9703 | 0  | 60 |         |                                                                                                 |     |
|       | 988.0299 (2+)  | 1974.0452 | 1974.0456 | 0  | 56 |         |                                                                                                 |     |
| 23.95 | 458.9298 (3+)  | 1373.7676 | 1373.7667 | 1  | 34 | 43-54   | R.LIFAG <b>K</b> QLEDGR.T Dimethyl (K6), ubiquitin                                              | 18% |
|       | 460.9425 (3+)  | 1379.8057 | 1379.8043 | 1  | 31 |         |                                                                                                 |     |
|       | 687.8908 (2+)  | 1373.7670 | 1373.7667 | 0  | 74 |         |                                                                                                 |     |
|       | 690.9097 (2+)  | 1379.8048 | 1379.8043 | 0  | 74 |         |                                                                                                 |     |
|       | 549.2564 (2+)  | 1096.4982 | 1096.4978 | 0  | 69 | 540-548 | R.YYGYTGAFR.C apotransferrin, lysine-free peptide                                               |     |
| 24.38 | 454.5714 (3+)  | 1360.6924 | 1360.6922 | 0  | 34 | 133-143 | R.C <b>K</b> GTDVQAWIR.G Dimethyl (K2), lysozyme C                                              | 24% |
|       | 456.5839 (3+)  | 1366.7282 | 1366.7298 | -1 | 36 |         |                                                                                                 |     |
|       | 681.3539 (2+)  | 1360.6932 | 1360.6922 | 1  | 40 |         |                                                                                                 |     |
|       | 684.3727 (2+)  | 1366.7308 | 1366.7298 | 1  | 40 |         |                                                                                                 |     |
| 25.00 | 556.6615 (3+)  | 1666.9611 | 1666.9618 | 0  | 59 | 437-451 | R. <b>K</b> VPQVSTPTLVEVSR.S Dimethyl (K2), albumin                                             | 9%  |
|       | 558.6739 (3+)  | 1672.9983 | 1672.9994 | -1 | 66 |         |                                                                                                 |     |
|       | 834.4888 (2+)  | 1666.9630 | 1666.9618 | 1  | 67 |         |                                                                                                 |     |
|       | 837.5067 (2+)  | 1672.9988 | 1672.9994 | 0  | 72 |         |                                                                                                 |     |

|       |                |           |           |    |     |         |                                                                                                                 |      |
|-------|----------------|-----------|-----------|----|-----|---------|-----------------------------------------------------------------------------------------------------------------|------|
| 27.00 | 649.3221 (3+)  | 1944.9445 | 1944.9438 | 0  | 81  | 689-704 | R.QCSTS <b>K</b> LLEACTFH <b>K</b> P. - (protein C-terminus) Gln->pyro-Glu, 2Dimethyl (K6, K15), apotransferrin | 14%  |
|       | 653.3460 (3+)  | 1957.0162 | 1957.0191 | -1 | 59  |         |                                                                                                                 |      |
|       | 973.4809 (2+)  | 1944.9472 | 1944.9438 | 2  | 61  |         |                                                                                                                 |      |
|       | 979.5176 (2+)  | 1957.0195 | 1957.0191 | 0  | 60  |         |                                                                                                                 |      |
| 28.60 | 723.3561 (1+)  | 722.3483  | -         | -  | -   | -       | Unknown singly charge ion peak <sup>(*b)</sup>                                                                  | 11%  |
| 27.87 | 805.4330 (2+)  | 1608.8514 | 1608.8511 | 0  | 44  | 141-154 | 2 R.NDIAA <b>KYK</b> ELGFQG.- (protein C-terminus) ,                                                            | 16%  |
|       | 811.4709 (2+)  | 1620.9272 | 1620.9264 | 1  | 45  |         | 2 Dimethyl (K6,K8), myoglobin                                                                                   |      |
| 29.56 | 877.4208 (2+)  | 1752.8270 | 1752.8278 | 0  | 106 | 64-79   | R.NTDGSTDYGILQINSR.W lysozyme C, lysine-free                                                                    | 43%  |
|       | 882.4281 (4+)  | 3525.6833 | 3525.6834 | 0  | 43  | 59-89   | R.MVNNGHSFNVEYDDSQD <b>KAVLKD</b> GPLTGTYR.L                                                                    |      |
|       | 885.4469 (4+)  | 3537.7585 | 3537.7588 | 0  | 36  |         | 2 Dimethyl (K18, K22), carbonic anhydrase 2                                                                     |      |
|       | 1176.2349 (3+) | 3525.6812 | 3525.6834 | -1 | 81  |         |                                                                                                                 |      |
|       | 1180.2594 (3+) | 3537.7547 | 3537.7588 | -1 | 78  |         |                                                                                                                 |      |
| 30.48 | 862.0587 (3+)  | 2583.1543 | 2583.1528 | 1  | 62  | 90-111  | R.LVQFHFHWGSSDDQGSEHTVDR.K carbonic anhydrase 2, lysine-free peptide                                            | 3%   |
| 30.77 | 844.4231 (2+)  | 1686.8316 | 1686.8325 | -1 | 69  | 128-143 | R.GGLEPINFQTAADQAR.E, ovalbumin, lysine-free peptide                                                            | 100% |
| 31.76 | 720.0674 (3+)  | 2157.1804 | 2157.1793 | 0  | 54  | 55-72   | R.TLSDYNIQ <b>K</b> ESTLHLVLR.L Dimethyl (K9), ubiquitin                                                        | 22%  |
|       | 722.0797 (3+)  | 2163.2173 | 2163.2170 | 0  | 56  |         |                                                                                                                 |      |
|       | 1079.5970 (2+) | 2157.1794 | 2157.1793 | 0  | 70  |         |                                                                                                                 |      |
|       | 1082.0314 (2+) | 2163.2154 | 2163.2170 | 0  | 45  |         |                                                                                                                 |      |
|       | 642.3163 (4+)  | 2565.2361 | 2565.2356 | 0  | 52  | 256-277 | R. <b>K</b> SVDDYQECYLAMVPSHAVVAR.T Dimethyl (K1), apotransferrin                                               |      |
|       | 643.8257 (4+)  | 2571.2737 | 2571.2732 | 0  | 43  |         |                                                                                                                 |      |
|       | 856.0858 (3+)  | 2565.2356 | 2565.2356 | 0  | 55  |         |                                                                                                                 |      |
|       | 858.0989 (3+)  | 2571.2749 | 2571.2732 | 1  | 69  |         |                                                                                                                 |      |
| 34.88 | 566.3010 (1+)  | 565.2932  | -         | -  | -   | -       | Unknown singly charged ion peaks <sup>(*b)</sup>                                                                | 9%   |
|       | 572.3387 (1+)  | 571.3309  | -         | -  | -   | -       |                                                                                                                 |      |
| 35.29 | 556.9789 (3+)  | 1667.9149 | 1667.9147 | 0  | 28  | 115-127 | R.EHFVDLLLS <b>K</b> HFR.T Dimethyl (K10), alpha-1-acid glycoprotein                                            | 8%   |
|       | 558.9916 (3+)  | 1673.9530 | 1673.9524 | 0  | 24  |         |                                                                                                                 |      |
|       | 834.9649 (2+)  | 1667.9152 | 1667.9147 | 0  | 61  |         |                                                                                                                 |      |
|       | 837.9836 (2+)  | 1673.9526 | 1673.9524 | 0  | 67  |         |                                                                                                                 |      |
| 36.43 | 858.4070 (2+)  | 1714.7994 | 1714.7985 | 1  | 75  | 165-178 | R.LSFNPTQLEEQCHI.- (protein C-terminus), beta-lactoglobulin precursor ; lysine-free peptide                     | 70%  |
| 37.38 | 716.4095 (1+)  | 715.4017  | -         | -  | -   | -       | Unknown singly charged ion peak <sup>(*b)</sup>                                                                 | 16%  |
|       | 1055.4623 (1+) | 1054.4545 | -         | -  | -   | -       | Unknown singly charged ion peak <sup>(*b)</sup>                                                                 |      |
| 39.34 | 929.9872 (2+)  | 1857.9598 | 1857.9585 | 1  | 104 | 144-159 | R.ELINSWVESQTNGIIR.N, ovalbumin, lysine-free peptide                                                            | 39%  |
| 40.28 | 721.1129 (4+)  | 2880.4203 | 2880.4219 | -1 | 22  | 659-682 | R.DDT <b>K</b> CLASIA <b>KK</b> TYDSYLGDDYVR.A 3 Dimethyl                                                       | 16%  |
|       | 725.6411 (4+)  | 2898.5353 | 2898.5345 | 0  | 21  |         | 2H(6) (K4, K11, K12), apotransferrin                                                                            |      |
|       | 961.1479 (3+)  | 2880.4219 | 2880.4219 | 1  | 42  |         |                                                                                                                 |      |
|       | 967.1860 (3+)  | 2898.5362 | 2898.5345 | 1  | 38  |         |                                                                                                                 |      |

|       |                |           |           |    |     |         |                                                                                                                |     |
|-------|----------------|-----------|-----------|----|-----|---------|----------------------------------------------------------------------------------------------------------------|-----|
| 41.25 | 770.4098 (3+)  | 2308.2059 | 2308.2063 | 0  | 52  | 86-105  | R.DILNQITKPNADVVSFLASR.L Dimethyl (K8);<br>ovalbumin                                                           | 17% |
|       | 772.4218 (3+)  | 2314.2436 | 2314.2439 | 0  | 55  |         |                                                                                                                |     |
|       | 1155.1110 (2+) | 2308.2074 | 2308.2063 | 1  | 85  |         |                                                                                                                |     |
|       | 1158.1300 (2+) | 2314.2454 | 2314.2439 | 1  | 79  |         |                                                                                                                |     |
| 41.89 | 921.7701 (3+)  | 2762.2885 | 2762.2871 | 1  | 81  | 40-63   | R.GYSLGNWVCAAKFESNFNTQATNR.N Dimethyl<br>(K12), lysozyme C                                                     | 38% |
|       | 923.7826 (3+)  | 2768.3260 | 2768.3247 | 0  | 78  |         |                                                                                                                |     |
|       | 929.9871 (2+)  | 1857.9596 | 1857.9585 | 1  | 104 | 144-159 | R.ELINSWVESQTNGIIR.N , ovalbumin, lysine-free peptide                                                          |     |
| 42.69 | 713.3813 (2+)  | 1424.7480 | 1424.7452 | 2  | 70  | 62-73   | R.AIQAAFFYLEPR.H alpha-1-acid glycoprotein, lysine-free<br>peptide                                             | 18% |
| 43.46 | 930.4788 (2+)  | 1858.9420 | 1858.9425 | 0  | 73  | 144-159 | R.ELINSWVESQTNGIIR.N Deamidated (N) , ovalbumin,<br>lysine-free peptide with a NG motif                        | 16% |
|       | 781.1013 (3+)  | 2340.2821 | 2340.2828 | 0  | 82  | 57-76   | R.VYVEELKPTPEGDLEILLQK.W Dimethyl (K7); beta-<br>lactoglobulin,                                                |     |
|       | 783.1146 (3+)  | 2346.3220 | 2346.3205 | 1  | 75  |         |                                                                                                                |     |
| 44.32 | 771.3978 (3+)  | 2311.1716 | 2311.1704 | 0  | 74  | 201-219 | R.VTEQESKPVQMMYQIGLFR.V Dimethyl (K7)                                                                          | 5%  |
|       | 773.4111 (3+)  | 2317.2115 | 2317.2081 | 1  | 52  |         | ovalbumin                                                                                                      |     |
| 45.00 | 570.9150 (5+)  | 2849.5386 | 2849.5360 | 1  | 26  | 141-164 | R.TPEVDDEALEKFDKALKALPMHIR.L 3 Dimethyl<br>(K11, K14, K17), beta-lactoglobulin                                 | 24% |
|       | 574.5371 (5+)  | 2867.6464 | 2867.6490 | -1 | 28  |         |                                                                                                                |     |
|       | 950.8517 (3+)  | 2849.5333 | 2849.5360 | -1 | 64  |         |                                                                                                                |     |
|       | 956.8906 (3+)  | 2867.6500 | 2867.6490 | 0  | 82  |         |                                                                                                                |     |
|       | 810.1991 (4+)  | 3236.7673 | 3236.7656 | 1  | 24  | 28-57   | R.QSPVDIDTKAVVQDPALKPLALVYGEATSR.R 2<br>Dimethyl (K9, K18), carbonic anhydrase 2                               |     |
|       | 813.2173 (4+)  | 3248.8401 | 3248.8409 | 0  | 25  |         |                                                                                                                |     |
|       | 1079.9300 (3+) | 3236.7682 | 3236.7656 | 1  | 51  |         |                                                                                                                |     |
|       | 1083.9540 (3+) | 3248.8402 | 3248.8409 | 0  | 41  |         |                                                                                                                |     |
| 46.12 | 704.7118 (3+)  | 2111.1136 | 2111.1125 | 1  | 21  | 112-127 | R.YPILPEYLQCVKELYR.G Dimethyl (K12), ovalbumin                                                                 | 12% |
|       | 706.7245 (3+)  | 2117.1500 | 2117.1501 | 0  | 29  |         |                                                                                                                |     |
|       | 1056.5640 (2+) | 2111.1134 | 2111.1125 | 0  | 58  |         |                                                                                                                |     |
|       | 1059.5820 (2+) | 2117.1494 | 2117.1501 | 0  | 77  |         |                                                                                                                |     |
|       | 772.7966 (5+)  | 3858.9466 | 3858.9589 | -3 | 71  | 135-166 | R.LHSMKEGIHAQQKEPMIGVNQELAYFYPELFR.Q 2<br>Dimethyl (K5, K13), alpha-S1-casein                                  |     |
|       | 775.2147 (5+)  | 3871.0344 | 3871.0341 | 0  |     |         |                                                                                                                |     |
|       | 965.7454 (4+)  | 3858.9503 | 3858.9589 | -2 | 60  |         |                                                                                                                |     |
|       | 968.7679 (4+)  | 3871.0403 | 3871.0341 | 2  | 56  |         |                                                                                                                |     |
| 47.25 | 634.3566 (2+)  | 1266.6986 | 1266.6972 | 1  | 68  | 106-115 | R.YLGYLEQLLR.L alpha-S1-casein, lysine-free peptide                                                            | 21% |
| 48.24 | 862.9213 (2+)  | 1723.8280 | 1723.8273 | 0  | 115 | 469-482 | R.MPCTEDYLSLILNR.L, albumin, lysine-free peptide                                                               | 52% |
|       | 720.4102 (2+)  | 1438.8058 | 1438.8045 | 0  | 80  | 360-371 | R.RHPEYAVSVLLR.L, albumin, lysine-free peptide                                                                 |     |
| 48.80 | 1074.2540 (3+) | 3219.7402 | 3219.7391 | 0  | 58  | 28-57   | R.QSPVDIDTKAVVQDPALKPLALVYGEATSR.R Gln-<br>>pyro-Glu (N-term Q); 2 Dimethyl (K9, K18); carbonic<br>anhydrase 2 | 8%  |
|       | 1078.2790 (3+) | 3231.8152 | 3231.8144 | 0  | 51  |         |                                                                                                                |     |

|       |                |           |           |    |     |         |                                                                            |     |
|-------|----------------|-----------|-----------|----|-----|---------|----------------------------------------------------------------------------|-----|
| 49.83 | 706.8844 (2+)  | 1411.7542 | 1411.7540 | 0  | 22  | 38-49   | R.FFVAPFPEVFG <u>K</u> .E Dimethyl (K12); alpha-S1-casein <sup>(*)c)</sup> | 1%  |
|       | 709.9041 (2+)  | 1417.7936 | 1417.7917 | 1  | 30  |         |                                                                            |     |
| 52.95 | 966.2198 (4+)  | 3860.8501 | 3860.8477 | 1  | 53  | 480-513 | R.TAGWNIPMGLLYS <u>K</u> INN <u>C</u> KFDEFSSAGCAPGSPR.N                   | 14% |
|       | 969.2379 (4+)  | 3872.9225 | 3872.9230 | 0  | 50  |         | 2 Dimethyl (K14,K19), apotransferrin                                       |     |
|       | 1287.9619 (3+) | 3860.8622 | 3860.8477 | 3  | 80  |         |                                                                            |     |
|       | 1291.9839 (3+) | 3872.9282 | 3872.9230 | 1  | 86  |         |                                                                            |     |
| 53.50 | 651.3502 (4+)  | 2601.3717 | 2601.3679 | 1  | 30  | 361-382 | R.ADHPFLFCI <u>K</u> HIIATNAVLFGR.C Dimethyl (K10) ,                       | 40% |
|       | 652.8586 (4+)  | 2607.4053 | 2607.4055 | 0  | 32  |         | ovalbumin                                                                  |     |
|       | 868.1312 (3+)  | 2601.3718 | 2601.3679 | 2  | 40  |         |                                                                            |     |
|       | 870.1432 (3+)  | 2607.4078 | 2607.4055 | 1  | 50  |         |                                                                            |     |
| 55.26 | 729.3948 (3+)  | 2185.1626 | 2185.1605 | 1  | 63  | 199-217 | R.DMPIQAFLLYQEPVLPVR.G , beta-casein, lysine-free                          | 2%  |
|       | 1093.5880 (2+) | 2185.1614 | 2185.1605 | 0  | 81  |         | peptide                                                                    |     |
| 60.13 | 1088.0404 (4+) | 4348.1303 | 4348.1226 | 2  |     | 92-130  | R.NLCNIPCSALLSSDITASVNCA <u>K</u> KIVSDGNGMNAWV                            | 5%  |
|       | 1091.0590 (4+) | 4360.2069 | 4360.1978 | 2  | 23  |         | AWR.N 2 Dimethyl (K23, K24), lysozyme C                                    |     |
| 61.75 | 865.7067 (4+)  | 3458.7955 | 3458.7947 | 0  | 29  | 2-32    | M.GLSGDGEWQQVLNVWG <u>K</u> VEADIAGHGQEVLR.L ,                             | 39% |
|       | 868.7254 (4+)  | 3470.8703 | 3470.8699 | 0  | 39  |         | Dimethyl (K16), N-terminal dimethylation, myoglobin                        |     |
|       | 1153.9386 (3+) | 3458.7923 | 3458.7947 | -1 | 120 |         |                                                                            |     |
|       | 1157.9642 (3+) | 3470.8691 | 3470.8699 | 0  | 128 |         |                                                                            |     |
| 62.40 | 1174.3653 (4+) | 4693.4299 | 4693.4290 | 0  | 35  | 160-200 | R.NVLQPSSVDSQTAMVLVNAIVF <u>K</u> GLWE <u>K</u> AF <u>K</u> DEDT           | 18% |
|       | 1178.8940 (4+) | 4711.5469 | 4711.5418 | 1  | 36  |         | QAMPFR.V 3 Dimethyl (K23, K28, K31), ovalbumin                             |     |
| 65.38 | 1090.8477 (4+) | 4359.3595 | 4359.3975 | -9 | 31  | 1-40    | -LIVTQTM <u>K</u> GLDIQ <u>K</u> VAGTWYSLAMAASDISLLDAQS                    | 7%  |
|       | 1095.3750 (4+) | 4377.4687 | 4377.5103 | -9 | 34  |         | APLR.V 2 Dimethyl (K8,K14); oxidation, N-terminal                          |     |
|       |                |           |           |    |     |         | dimethylation, beta-lactoglobulin                                          |     |
| 67.79 | 880.9455 (4+)  | 3519.7529 | 3519.7465 | 2  | 84  | 21-51   | K.VHHANENIFYCPIAIMSALAMVYLGA <u>K</u> DSTR.T                               | 4%  |
|       | 882.4536 (4+)  | 3525.7853 | 3525.7841 | 0  | 45  |         | Dimethyl (K27), ovalbumin                                                  |     |
| 68.67 | 968.8172 (6+)  | 5806.8563 | -         | -  | -   | -       | Too large peptide, not retrieved by database search                        | 5%  |
|       | 972.3392 (6+)  | 5827.9883 | -         | -  | -   | -       |                                                                            |     |

\* a) Dimethylated lysine labelled in bold red and underline (**K**).

b) Unknown peaks were not retrieved by database search because the singly charged ions were excluded by MS/MS data acquisition. Some of them might be the trypsin autolysis products or other contaminants.

c) Unexpected peptide pairs cleaved at the dimethylated lysine residue (at 10.82 min; 14.56min and 49.83min).

**Table S3, Identification of Tropomyosin(TPM) Peptides from an Un-modified MSC Nuclear Extract**

| Protein | Peptide | m/z(charge)  | Mr(expt)                                                               | Mr(calc)                                                   | ppm              | Score                                       | Miss | Sequence               | Unique |
|---------|---------|--------------|------------------------------------------------------------------------|------------------------------------------------------------|------------------|---------------------------------------------|------|------------------------|--------|
| TPM1    | 1       | MDAIKKKMQMLK | <u>LDKENALDRAEQAEADKK</u> AAEDR                                        | <u>SKQLEDELVSLQK</u> KLKGTEDELDKYSEALKDAQEKLELAEK          |                  |                                             |      | <u>KATD</u>            | 80     |
| TPM2    | 1       | MDAIKKKMQMLK | <u>LDKENAIDRAEQAEADKK</u> QAEDRCKQLEEEQQALQKKLKGTEDevekYSESVKDAQEKLEQA | <u>EK</u>                                                  |                  |                                             |      | <u>KATD</u>            | 80     |
| TPM3    | 1       | MAGTTT-----  | IEAVKRKIQVLQQQADDAEERAER-----                                          | LQR-----                                                   |                  |                                             |      | EVE-----GER-RAREQ----  | 44     |
| TPM4    | 1       | MAGLNS-----  | LEAVKR <u>KIQALQQQADDAEDRAQG</u> -----                                 | <u>LQR</u> -----                                           |                  |                                             |      | ELD-----GER-ERREK----  | 44     |
| TPM1    | 81      |              | <u>AEADVASLNRRRIQLVEEELDRAQERLATALQKLEEA</u> EKAADSE                   | <u>RGMKVIESRAQKDEEKMEIQEIQLK</u> EAKHIAEDADR               |                  |                                             |      |                        | 160    |
| TPM2    | 81      |              | <u>AEADVASLNRRRIQLVEEELDRAQERLATALQKLEEA</u> EKAADSE                   | <u>RGMKVIENRAMKDEEKMELQEMQLK</u> EAKHIAEDSDR               |                  |                                             |      |                        | 160    |
| TPM3    | 45      | AEAEVASLNRR  | <u>IQLVEEELDRAQERLATALQKLEEA</u> EKAADSE                               | <u>RGMKVIENRALKDEEKMELQEIQLK</u> EAKHIAEEADR               |                  |                                             |      |                        | 124    |
| TPM4    | 45      | AEGDAAALNRR  | <u>IQLLEEELDRAQEQLATALQNL</u> EEA EKAADSE                              | <u>RGMKVIENRAMKDEEKMEILEMQLK</u> EAKHITDEADR               |                  |                                             |      |                        | 124    |
| TPM1    | 161     |              | <u>KYEEVAR</u> KLVIIESDLERAEE                                          | RAELSEGQVR                                                 | <u>QLEEQLR</u>   | IMDQTLKALMAAEDKYSQKEDKYEEEIKVLSDKLKEAETRAE  |      |                        | 240    |
| TPM2    | 161     |              | <u>KYEEVAR</u> KLVIILEGELERSEER                                        | AEVAESRAR                                                  | <u>QLEEELR</u>   | TMDQALKSLIASSEEEYSTKEDKYEEEIKLLEEKLKEAETRAE |      |                        | 240    |
| TPM3    | 125     |              | <u>KYEEVAR</u> KLVIIEGDLERTEER                                         | AELAESRCREMDEQIRLMDQNLKCLSAAEEKYSQKEDKYEEEIKILTDKLKEAETRAE |                  |                                             |      |                        | 204    |
| TPM4    | 125     |              | <u>KYEEVAR</u> KLVIILEGELKRAEERA                                       | EVSELK                                                     | <u>CGDLEEELK</u> | NVTNNLKSLEAASEKYSEKEDKYEEEIKLLSDKLKEAETRAE  |      |                        | 204    |
| TPM1    | 241     | FAERSVTKLEKS | SIDDL                                                                  | EELKVAHAKEENLSMHQMLDQTLLELNNM                              |                  |                                             | 284  |                        |        |
| TPM2    | 241     | FAERSVAKLEKT | TIDDL                                                                  | EETLASAKEENVEIHQTLDQTLLELNNL                               |                  |                                             | 284  |                        |        |
| TPM3    | 205     | FAERSVAKLEK  | <u>TIDDL</u>                                                           | <u>EDKLK</u> CTKEEHLCTQRM                                  | LDQTL            | LDL                                         | NEM  | 248                    |        |
| TPM4    | 205     | FAERTVSKLEKT | TIDDL                                                                  | EELK <u>LAQAKEENVGLHQTL</u> DQTLNELNCI                     |                  |                                             | 248  |                        |        |
| TPM1    | 13-30   | 511.7629(4+) | 2043.0225                                                              | 2043.0232                                                  | 0                | 57                                          | 3    | K.LDKENALDRAEQAEADKK.A |        |
|         | 36-48   | 506.2786(3+) | 1515.8141                                                              | 1515.8144                                                  | 0                | 24                                          | 1    | R.SKQLEDELVSLQK.K      | U      |
|         |         | 758.9145(2+) | 1515.8145                                                              | 1515.8144                                                  | 0                | 88                                          | 1    |                        |        |
|         | 77-90   | 487.5834(3+) | 1459.7282                                                              | 1459.7267                                                  | 1                | 30                                          | 1    | K.KATDAEADVASLNR.R     |        |
|         |         | 730.8705(2+) | 1459.7265                                                              | 1459.7267                                                  | 0                | 120                                         | 1    |                        |        |
|         | 77-91   | 539.6171(3+) | 1615.8279                                                              | 1615.8278                                                  | 0                | 41                                          | 2    | K.KATDAEADVASLNRR.I    |        |
|         | 78-90   | 666.8231(2+) | 1331.6317                                                              | 1331.6317                                                  | 0                | 64                                          | 0    | K.ATDAEADVASLNR.R      |        |
|         | 78-91   | 496.9187(3+) | 1487.7342                                                              | 1487.7328                                                  | 1                | 24                                          | 1    | K.ATDAEADVASLNRR.I     |        |
|         |         | 744.8732(2+) | 1487.7308                                                              | 1487.7328                                                  | -1               | 56                                          | 1    |                        |        |
|         | 92-101  | 622.3287(2+) | 1242.6428                                                              | 1242.6456                                                  | -2               | 77                                          | 0    | R.IQLVEEELDR.A         |        |
|         | 92-105  | 576.6357(3+) | 1726.8852                                                              | 1726.8849                                                  | 0                | 30                                          | 1    | R.IQLVEEELDRAQER.L     |        |
|         |         | 864.4498(2+) | 1726.8840                                                              | 1726.8850                                                  | -1               | 48                                          | 1    |                        |        |



|      |         |               |           |           |    |     |   |                           |   |
|------|---------|---------------|-----------|-----------|----|-----|---|---------------------------|---|
|      | 106-118 | 481.9400 (3+) | 1442.7983 | 1442.7980 | 0  | 26  | 1 | R.LATALQKLEEA EK.A        |   |
|      |         | 722.4063(2+)  | 1442.7981 | 1442.7980 | 0  | 78  | 1 |                           |   |
|      | 106-125 | 551.2871(4+)  | 2201.1193 | 2201.1175 | 1  | 45  | 2 | R.LATALQKLEEA EKAADESER.G |   |
|      |         | 734.7132(3+)  | 2201.1161 | 2201.1175 | -1 | 71  | 2 |                           |   |
|      | 134-139 | 490.7561(4+)  | 1958.9931 | 1958.9983 | -3 | 15  | 2 | R.AQKDEEKMEIQEIQLK.E      | U |
|      |         | 654.0068(3+)  | 1958.9969 | 1958.9983 | -1 | 56  | 2 |                           |   |
|      | 153-160 | 463.7193(2+)  | 925.4241  | 925.4253  | -1 | 28  | 0 | K.HIAEDADR.K              | U |
|      | 161-167 | 447.7377(3+)  | 893.4609  | 893.4606  | 0  | 28  | 1 | R.KYEEVAR.K               |   |
|      | 169-182 | 557.9689(3+)  | 1670.8850 | 1670.8839 | 1  | 24  | 1 | K.LVIESDLERAEER.A         |   |
|      | 192-198 | 458.7401(2+)  | 915.4646  | 915.4661  | -1 | 60  | 0 | R.QLEEQLR.I               |   |
| TPM2 | 13-30   | 511.7629(4+)  | 2043.0225 | 2043.0232 | 0  | 57  | 3 | K.LDKENALDRAEQAEADKK.A    |   |
|      | 77-90   | 487.5834(3+)  | 1459.7282 | 1459.7267 | 1  | 30  | 1 | K.KATDAEADVASLNR.R        |   |
|      |         | 730.8705(2+)  | 1459.7265 | 1459.7267 | 0  | 120 | 1 |                           |   |
|      | 77-91   | 539.6171(3+)  | 1615.8279 | 1615.8278 | 0  | 41  | 2 | K.KATDAEADVASLNR.R.I      |   |
|      | 78-90   | 666.8231(2+)  | 1331.6317 | 1331.6317 | 0  | 64  | 0 | K.ATDAEADVASLNR.R         |   |
|      | 78-91   | 496.9187(3+)  | 1487.7342 | 1487.7328 | 1  | 24  | 1 | K.ATDAEADVASLNR.R.I       |   |
|      |         | 744.8732(2+)  | 1487.7308 | 1487.7328 | -1 | 56  | 1 |                           |   |
|      | 92-101  | 622.3287(2+)  | 1242.6428 | 1242.6456 | -2 | 77  | 0 | R.IQLVEEELDR.A            |   |
|      | 92-105  | 576.6357(3+)  | 1726.8852 | 1726.8849 | 0  | 30  | 1 | R.IQLVEEELDRAQER.L        |   |
|      |         | 864.4498(2+)  | 1726.8840 | 1726.8850 | -1 | 48  | 1 |                           |   |
|      | 106-118 | 481.9400 (3+) | 1442.7983 | 1442.7980 | 0  | 26  | 1 | R.LATALQKLEEA EK.A        |   |
|      |         | 722.4063(2+)  | 1442.7981 | 1442.7980 | 0  | 78  | 1 |                           |   |
|      | 106-125 | 551.2871(4+)  | 2201.1193 | 2201.1175 | 1  | 45  | 2 | R.LATALQKLEEA EKAADESER.G |   |
|      |         | 734.7132(3+)  | 2201.1161 | 2201.1175 | -1 | 71  | 2 |                           |   |
|      | 161-167 | 447.7377(3+)  | 893.4609  | 893.4606  | 0  | 28  | 1 | R.KYEEVAR.K               |   |
|      | 169-182 | 557.9689(3+)  | 1670.8850 | 1670.8839 | 1  | 24  | 1 | K.LVILEGELERSEER.A        |   |
|      | 192-198 | 458.7401(2+)  | 915.4646  | 915.4661  | -1 | 60  | 0 | R.QLEEQLR.I               |   |
| TPM3 | 56-65   | 622.3287(2+)  | 1242.6428 | 1242.6456 | -2 | 77  | 0 | R.IQLVEEELDR.A            |   |
|      | 56-69   | 576.6357(3+)  | 1726.8852 | 1726.8849 | 0  | 30  | 1 | R.IQLVEEELDRAQER.L        |   |
|      |         | 864.4498(2+)  | 1726.8840 | 1726.8850 | -1 | 48  | 1 |                           |   |
|      | 70-82   | 481.9400 (3+) | 1442.7983 | 1442.7980 | 0  | 26  | 1 | R.LATALQKLEEA EK.A        |   |
|      |         | 722.4063(2+)  | 1442.7981 | 1442.7980 | 0  | 78  | 1 |                           |   |
|      | 70-89   | 551.2871(4+)  | 2201.1193 | 2201.1175 | 1  | 45  | 2 | R.LATALQKLEEA EKAADESER.G |   |
|      |         | 734.7132(3+)  | 2201.1161 | 2201.1175 | -1 | 71  | 2 |                           |   |
|      | 98-113  | 649.0160(3+)  | 1944.0245 | 1944.0238 | 0  | 37  | 2 | R.ALKDEEKMEIQEIQLK.E      | U |

|      |         |               |           |           |    |     |   |                               |   |
|------|---------|---------------|-----------|-----------|----|-----|---|-------------------------------|---|
|      | 125-131 | 447.7377(3+)  | 893.4609  | 893.4606  | 0  | 28  | 1 | R.KYEEVAR.K                   |   |
|      | 133-146 | 557.9689(3+)  | 1670.8850 | 1670.8839 | 1  | 24  | 1 | K.LVIIEGDLERTEER.A            |   |
|      | 216-225 | 595.3195(2+)  | 1188.6244 | 1188.6238 | 1  | 44  | 1 | K.TIDDLK.LK.C                 | U |
| TPM4 | 13-27   | 576.9547(3+)  | 1727.8406 | 1727.8438 | -2 | 62  | 1 | R.KIQALQQADDAEDR.A            | U |
|      | 13-33   | 794.7419(3+)  | 2381.2022 | 2381.2047 | -1 | 87  | 2 | R.KIQALQQADDAEDRAQGLQR.E      | U |
|      | 14-27   | 800.8824(2+)  | 1599.7502 | 1599.7489 | 1  | 106 | 0 | K.IQALQQADDAEDR.A             | U |
|      | 56-65   | 629.3377(2+)  | 1256.6609 | 1256.6612 | 0  | 53  | 0 | R.IQLLEEELDR.A                | U |
|      | 66 - 89 | 882.0948(3+)  | 2643.2609 | 2643.2624 | -1 | 86  | 1 | R.AQEQLATALQNLEEAKEKADESER.G  | U |
|      | 117-124 | 478.7255(2+)  | 955.4354  | 955.4359  | 1  | 34  | 0 | K.HITDEADR.K                  | U |
|      | 125-131 | 447.7377(3+)  | 893.4609  | 893.4606  | 0  | 28  | 1 | R.KYEEVAR.K                   |   |
|      | 154-162 | 546.7475(2+)  | 1091.4805 | 1091.4805 | 0  | 53  | 0 | K.CGDLEEELK.N                 | U |
|      | 224-246 | 951.1470(3+)  | 2850.4175 | 2850.4182 | 0  | 71  | 1 | K.LAQAKEENVGLHQTLNQTLNELNCI.- | U |
|      | 229-248 | 1170.5605(2+) | 2339.1054 | 2339.1063 | 0  | 39  | 0 | K.EENVGLHQTLNQTLNELNCI.-      | U |

Proteins were digested by trypsin, and the resulting peptides were identified by the data dependent MS/MS scan of top eight ions at an UPLC run of 4 hrs. "U" is shown unique ions specific to the protein isoform, while others are shared by the isoforms.

**Table S4. MS/MS Identification of the Peptides in Two Sets of Protein Isoforms**

| Protein                                                                 | Peptide   | Scan of 2+<br>m/z (charge) | ppm | Score | Scan of 3+<br>m/z (charge) | ppm | Score | Miss | Peptide sequence                        |
|-------------------------------------------------------------------------|-----------|----------------------------|-----|-------|----------------------------|-----|-------|------|-----------------------------------------|
| <i>Conserved dimethylated peptide pairs of tropomyosins (TPM)</i>       |           |                            |     |       |                            |     |       |      |                                         |
| TPM1;TPM2                                                               | 106 - 125 | 1129.5985(2+)              | 1   | 106   | 753.4015(3+)               | 1   | 71    | 2    | R.LATALQKLEEAEEKAADESER.G 2 Dimethyl    |
| TPM3;TPM4                                                               | 70 - 89   | 1135.6357(2+)              | 0   | 94    | 757.4260(3+)               | 0   | 62    | 2    | (K7, K13)                               |
| TPM2                                                                    | 126 - 133 | 487.7761(2+)               | 0   | 39    | 325.5198(3+)               | 0   | 38    | 1    | R.GMKVIENR.A Dimethyl (K3)              |
| TPM3;TPM4                                                               | 90 - 97   | 490.7946(2+)               | 1   | 33    | 327.5322(3+)               | -1  | 29    | 1    |                                         |
| TPM1;TPM2                                                               | 161 - 167 | 461.7531(2+)               | 0   | 33    | 308.1708(3+)               | -2  | 27    | 1    | R.KYEEVAR.K Dimethyl (K1)               |
| TPM3;TPM4                                                               | 125 - 131 | 464.7721(2+)               | 0   | 34    | 310.1836(3+)               | -1  | 29    | 1    |                                         |
| <i>Unique dimethylated peptide pairs of tropomyosins (TPM)</i>          |           |                            |     |       |                            |     |       |      |                                         |
| TPM1                                                                    | 22 - 35   | 794.4022(2+)               | 0   | 82    | 529.9372(3+)               | 0   | 35    | 2    | R.AEQAEADKKA AEDR.S 2 Dimethyl (K8, K9) |
|                                                                         |           | 800.4391(2+)               | -1  | 80    | 533.9625(3+)               | 0   | 34    | 2    |                                         |
|                                                                         | 126 - 133 | 474.2701(2+)               | -1  | 29    | 316.5162(3+)               | 0   | 37    | 1    | R.GMKVIESR.A Dimethyl (K3)              |
|                                                                         |           | 477.2896(2+)               | 0   | 25    | 318.5285(3+)               | -1  | 33    | 1    |                                         |
|                                                                         | 168 - 178 | 671.8997(2+)               | -1  | 60    | 448.2692(3+)               | -1  | 49    | 1    | R.KLVIIESDLER.A Dimethyl (K1)           |
|                                                                         |           | 674.9197(2+)               | 0   | 58    | 450.2819(3+)               | 0   | 45    | 1    |                                         |
| TPM2                                                                    | 22 - 35   | 822.9127(2+)               | 0   | 101   | 548.9445(3+)               | 0   | 36    | 2    | R.AEQAEADKKQAEDR.C 2 Dimethyl (K8, K9)  |
|                                                                         |           | 828.9512(2+)               | 1   | 97    | 552.9698(3+)               | 0   | 32    | 2    |                                         |
|                                                                         | 168 - 178 | 663.9026(2+)               | -1  | 62    | 442.9382(3+)               | 1   | 28    | 1    | R.KLVILEGELER.S Dimethyl (K1)           |
|                                                                         |           | 666.9211(2+)               | -1  | 52    | 444.9502(3+)               | -1  | 31    | 1    |                                         |
| TPM3                                                                    | 13 - 27   | 899.9688(2+)               | 0   | 117   | 600.3138(3+)               | -1  | 52    | 1    | R.KIQVLQQADDAEER.A Dimethyl (K1)        |
|                                                                         |           | 902.9877(2+)               | 1   | 119   | 602.3276(3+)               | 1   | 87    | 1    |                                         |
|                                                                         | 132 - 142 | 656.8951(2+)               | 0   | 45    | 438.2652(3+)               | -2  | 41    | 1    | R.KLVIIEGDLER.T Dimethyl (K1)           |
|                                                                         |           | 659.9147(2+)               | 1   | 48    | 440.2782(3+)               | -1  | 45    | 1    |                                         |
| TPM4                                                                    | 13 - 27   | 878.9446(2+)               | 0   | 94    | 586.2992(3+)               | 0   | 70    | 1    | R.KIQALQQADDAEDR.A Dimethyl (K1)        |
|                                                                         |           | 881.9642(2+)               | 1   | 101   | 588.3115(3+)               | 0   | 58    | 1    |                                         |
|                                                                         | 43 - 54   | 636.8301(2+)               | -1  | 65    | 424.8895(3+)               | 0   | 43    | 1    | R.EKAEGDAAALNR.R Dimethyl (K2)          |
|                                                                         |           | 639.8492(2+)               | -1  | 80    | 426.9019(3+)               | -1  | 29    | 1    |                                         |
|                                                                         | 66 - 89   | 1336.6539(2+)              | 0   | 87    | 891.4391(3+)               | 1   | 72    | 1    | R.AQEQLATALQNLEEAEEKAADESER.G           |
|                                                                         |           | 1339.6765(2+)              | 3   | 84    | 893.4516(3+)               | 1   | 59    | 1    | Dimethyl (K17)                          |
|                                                                         | 132 - 142 | 677.4452(2+)               | 0   | 41    | 451.9652(3+)               | -1  | 58    | 2    | R.KLVILEGELKR.A 2 Dimethyl (K1, K10)    |
|                                                                         |           | 683.4827(2+)               | 0   | 44    | 455.9905(3+)               | -1  | 51    | 2    |                                         |
| <i>Non-lysine containing peptides (unlabeled) of tropomyosins (TPM)</i> |           |                            |     |       |                            |     |       |      |                                         |
| TPM1;TPM2                                                               | 91 - 101  | 700.3792(2+)               | -2  | 48    | 467.2565(3+)               | -2  | 27    | 1    | R.RIQLVEEELDR.A                         |
|                                                                         | 92 - 101  | 622.3301(2+)               | 0   | 74    |                            |     |       | 0    | R.IQLVEEELDR.A                          |
|                                                                         | 92 - 105  |                            |     |       | 576.6345(3+)               | -2  | 43    | 1    | R.IQLVEEELDRAQER.L                      |

|                                                                |           |              |    |    |              |    |    |   |                                                      |                          |
|----------------------------------------------------------------|-----------|--------------|----|----|--------------|----|----|---|------------------------------------------------------|--------------------------|
|                                                                | 192 - 198 | 458.2483(2+) | 0  | 47 |              |    |    | 0 | R.QLEEQLR.I                                          |                          |
|                                                                | 239 - 244 | 361.6766(2+) | -1 | 33 |              |    |    | 0 | R.AEFAER.S                                           |                          |
| TPM1                                                           | 183 - 191 | 494.7551(2+) | -3 | 55 |              |    |    | 0 | R.AELSEGQVR.Q                                        |                          |
| TPM2                                                           | 183 - 189 | 381.1931(2+) | 0  | 31 |              |    |    | 0 | R.AEVAESR.A                                          |                          |
| TPM3                                                           | 43 - 54   | 658.8262(2+) | 1  | 78 | 439.5529(3+) | 0  | 22 | 0 | R.EQAEAEVASLNR.R                                     |                          |
|                                                                | 55 - 65   | 700.3792(2+) | -2 | 48 | 467.2565(3+) | -2 | 27 | 1 | R.RIQLVEEELDR.A                                      |                          |
|                                                                | 56 - 65   | 622.3301(2+) | 0  | 74 |              |    |    | 0 | R.IQLVEEELDR.A                                       |                          |
|                                                                | 56 - 69   |              |    |    | 576.6345(3+) | -2 | 36 | 1 | R.IQLVEEELDRAQER.L                                   |                          |
|                                                                | 147 - 153 | 388.2016(2+) | 2  | 26 |              |    |    | 0 | R.AELAESR.C                                          |                          |
|                                                                | 154 - 162 |              |    |    | 412.8542(3+) | 2  | 32 | 1 | R.CREMDEQIR.L                                        |                          |
|                                                                | 156 - 162 | 460.7106(2+) | 0  | 23 |              |    |    | 0 | R.EMDEQIR.L                                          |                          |
|                                                                | 203 - 208 | 361.6766(2+) | -1 | 33 |              |    |    | 0 | R.AEFAER.S                                           |                          |
|                                                                | 237 - 248 | 718.3447(2+) | 1  | 58 |              |    |    | 0 | R.MLDQTLDDLNM.-                                      |                          |
| TPM4                                                           | 28 - 33   | 336.6926(2+) | -1 | 35 |              |    |    | 0 | R.AQGLQR.E                                           |                          |
|                                                                | 34 - 39   | 359.6716(2+) | -1 | 49 |              |    |    | 0 | R.ELDGER.E                                           |                          |
|                                                                | 34 - 41   | 502.2431(2+) | -1 | 57 | 335.1652(3+) | 1  | 27 | 1 | R.ELDGERER.R                                         |                          |
|                                                                | 55 - 65   | 707.3882(2+) | 0  | 56 | 471.9285(3+) | 1  | 59 | 1 | R.RIQLLEEELDR.A                                      |                          |
|                                                                | 56 - 65   | 629.3376(2+) | 0  | 74 |              |    |    | 0 | R.IQLLEEELDR.A                                       |                          |
|                                                                | 203 - 208 | 361.6766(2+) | -1 | 38 |              |    |    | 0 | R.AEFAER.S                                           |                          |
| <i>Conserved dimethylated peptide pairs of 14-3-3 proteins</i> |           |              |    |    |              |    |    |   |                                                      |                          |
| 14-3-3                                                         | 44 - 57   | 766.4512(2+) | 1  | 73 | 511.3035(3+) | 0  | 47 | 1 | R.NLLSVAYK <del>N</del> VVGAR.R                      | Dimethyl (K8)            |
| beta,gamma,                                                    | 43 - 56   | 769.4697(2+) | -1 | 51 | 513.3155(3+) | -1 | 36 | 1 |                                                      |                          |
| Zeta                                                           | 42 - 55   |              |    |    |              |    |    |   |                                                      |                          |
| Eta                                                            | 43 - 56   |              |    |    |              |    |    |   |                                                      |                          |
| <i>Unique dimethylated peptide pairs of 14-3-3 proteins</i>    |           |              |    |    |              |    |    |   |                                                      |                          |
| 14-3-3 beta                                                    | 21 - 43   |              |    |    | 875.0636(3+) | 0  | 85 | 1 | R.YDDMAAAMK <del>A</del> VTEQGHLSNEER.N              |                          |
|                                                                |           |              |    |    | 877.0770(3+) | 1  | 78 | 1 | Dimethyl (K9)                                        |                          |
|                                                                | 63 - 73   | 659.3746(2+) | 4  | 58 | 439.9172(3+) | 0  | 27 | 1 | R.VISSIEQK <del>T</del> ER.D                         | Dimethyl (K8)            |
|                                                                |           | 662.3911(2+) | 0  | 61 | 441.9304(3+) | 1  | 33 | 1 |                                                      |                          |
| 14-3-3                                                         | 5 - 12    | 500.3011(2+) | 0  | 35 | 333.8698(3+) | 0  | 26 | 1 | R.EQLVQK <del>A</del> R.L                            | Dimethyl (K6)            |
| gamma                                                          |           | 503.3191(2+) | -1 | 34 | 335.8822(3+) | 0  | 22 | 1 |                                                      |                          |
|                                                                | 20 - 42   |              |    |    | 890.0796(3+) | 0  | 79 | 1 | R.YDDMAAAMK <del>N</del> VTELNEPLSNEER.N             |                          |
|                                                                |           |              |    |    | 892.0924(3+) | 1  | 66 | 1 | Dimethyl (K9)                                        |                          |
|                                                                | 62 - 83   |              |    |    | 849.4678(3+) | 1  | 64 | 3 | R.VISSIEQK <del>T</del> SADGNEK <del>K</del> IEMVR.A | 3Dimethyl (K8, K16, K17) |
|                                                                |           |              |    |    | 855.5040(3+) | 0  | 63 | 3 |                                                      |                          |
|                                                                | 133 - 143 | 632.8486(2+) | 0  | 62 | 422.2348(3+) | 0  | 45 | 1 | R.YLAEVATGEEK <del>R</del> .A                        | Dimethyl (K10)           |
|                                                                |           | 635.8672(2+) | 0  | 49 | 424.2472(3+) | 0  | 37 | 1 |                                                      |                          |
| 14-3-3 epsilon                                                 | 5 - 19    | 895.9684(2+) | 1  | 74 | 597.6473(3+) | -1 | 53 | 1 | R.EDLVYQAK <del>L</del> AEQAER.Y                     | Dimethyl (K10)           |

|                                                                      |           |               |    |    |               |    |     |   |                                                                                          |
|----------------------------------------------------------------------|-----------|---------------|----|----|---------------|----|-----|---|------------------------------------------------------------------------------------------|
|                                                                      |           | 898.9866(2+)  | 0  | 78 | 599.6608(3+)  | 1  | 56  | 1 |                                                                                          |
|                                                                      | 43 - 56   | 773.4601(2+)  | 1  | 89 | 515.9752(3+)  | 0  | 48  | 1 | R.NLLSVAYK <del>N</del> VIGAR.R Dimethyl (K8)                                            |
|                                                                      |           | 776.4767(2+)  | -2 | 75 | 517.9872(3+)  | -1 | 45  | 1 |                                                                                          |
|                                                                      | 62 - 83   |               |    |    | 886.5018(3+)  | 0  | 59  | 4 | R.IISSIEQ <del>K</del> EEN <del>K</del> GGED <del>K</del> L <del>K</del> MIR.E 4Dimethyl |
|                                                                      |           |               |    |    | 894.5520(3+)  | 0  | 48  | 4 | (K8, K12, K17, K19)                                                                      |
|                                                                      | 194 - 225 |               |    |    | 1209.6350(3+) | 1  | 133 | 2 | R.LA <del>K</del> AAFDDAIAELDTLSEESY <del>K</del> DSTLIMQLL                              |
|                                                                      |           |               |    |    | 1213.6593(3+) | 0  | 141 | 2 | R.D 2 Dimethyl (K3, K22)                                                                 |
|                                                                      | 226 - 255 |               |    |    | 1160.5058(3+) | 0  | 88  | 1 | R.DNLTWLTSDMQGDGEEQN <del>K</del> EALQDVEDEN                                             |
|                                                                      |           |               |    |    | 1162.5183(3+) | 0  | 97  | 1 | Q.- Dimethyl (K19)                                                                       |
| 14-3-3 zeta                                                          | 19 - 41   |               |    |    | 888.0529(3+)  | 0  | 82  | 1 | R.YDDMAACM <del>K</del> SVTEQGAELSNEER.N                                                 |
|                                                                      |           |               |    |    | 890.0659(3+)  | 1  | 74  | 1 | Dimethyl (K9)                                                                            |
|                                                                      | 61 - 80   |               |    |    | 777.7621(3+)  | 1  | 64  | 3 | R.VVSSIEQ <del>K</del> TEGAE <del>K</del> K <del>K</del> QMAR.E 3 Dimethyl               |
|                                                                      |           |               |    |    | 783.7990(3+)  | 0  | 55  | 3 | (K8, K14, K15)                                                                           |
|                                                                      | 84 - 91   | 523.2982(2+)  | 0  | 32 | 349.2012(3+)  | 0  | 28  | 1 | R.E <del>K</del> IETELR.D Dimethyl (K2)                                                  |
|                                                                      |           | 526.3167(2+)  | 0  | 36 | 351.2138(3+)  | 0  | 32  | 1 |                                                                                          |
| 14-3-3 eta                                                           | 20 - 42   |               |    |    | 876.4047(3+)  | 1  | 57  | 1 | R.YDDMASAM <del>K</del> AVTELNEPLSNEDR.N                                                 |
|                                                                      |           |               |    |    | 878.4164(3+)  | 0  | 76  | 1 | Dimethyl (K9)                                                                            |
| 14-3-3 theta                                                         | 19 - 41   |               |    |    | 892.7253(3+)  | 0  | 67  | 1 | R.YDDMATCM <del>K</del> AVTEQGAELSNEER.N                                                 |
|                                                                      |           |               |    |    | 894.7369(3+)  | 0  | 71  | 1 | Dimethyl (K9)                                                                            |
|                                                                      | 42 - 55   | 759.4462(2+)  | 3  | 68 | 506.6305(3+)  | -2 | 51  | 1 | R.NLLSVAYK <del>N</del> VVGGR.R Dimethyl (K8)                                            |
|                                                                      |           | 762.4612(2+)  | -2 | 64 | 508.6439(3+)  | 0  | 43  | 1 |                                                                                          |
|                                                                      | 84 - 91   | 509.2816(2+)  | -2 | 31 | 339.8572(3+)  | 0  | 24  | 1 | R.E <del>K</del> VESELR.S Dimethyl (K2)                                                  |
|                                                                      |           | 512.2996(2+)  | -3 | 27 | 341.8703(3+)  | 0  | 28  | 1 |                                                                                          |
| <i>Non-lysine containing peptides (unlabeled) of 14-3-3 proteins</i> |           |               |    |    |               |    |     |   |                                                                                          |
| 14-3-3 beta                                                          | 58 - 62   | 346.1851(2+)  | -1 | 26 |               |    |     | 1 | R.RSSWR.V                                                                                |
| 14-3-3 gamma                                                         | 13 - 19   | 408.7141(2+)  | 0  | 52 |               |    |     | 0 | R.LAEQAER.Y                                                                              |
|                                                                      | 57 - 61   | 346.1851(2+)  | -1 | 26 |               |    |     | 1 | R.RSSWR.V                                                                                |
|                                                                      | 228 - 247 | 1097.4430(2+) | 0  | 80 |               |    |     | 0 | R.DNLTWLTSDQDDDDGGEGNN.-                                                                 |
| 14-3-3 epsilon                                                       | 131 - 141 | 628.7986(2+)  | -1 | 51 |               |    |     | 0 | R.YLAEFATGNDR.K                                                                          |
| 14-3-3 zeta                                                          | 12 - 18   | 408.7141(2+)  | 0  | 52 |               |    |     | 0 | R.LAEQAER.Y                                                                              |
|                                                                      | 56 - 60   | 346.1851(2+)  | -1 | 26 |               |    |     | 1 | R.RSSWR.V                                                                                |
|                                                                      | 223-245   | 1205.0008(2+) | -1 | 52 |               |    |     | 0 | R.DNLTWLTSDTQGDEAEAGEGGEN.-                                                              |
| 14-3-3 eta                                                           | 5 - 10    | 393.7266(2+)  | -1 | 29 |               |    |     | 0 | R.EQLLQR.A                                                                               |
|                                                                      | 13 - 19   | 408.7141(2+)  | 0  | 52 |               |    |     | 0 | R.LAEQAER.Y                                                                              |
|                                                                      | 57 - 61   | 346.1851(2+)  | -1 | 26 |               |    |     | 1 | R.RSSWR.V                                                                                |
| 14-3-3 theta                                                         | 12 - 18   | 408.7141(2+)  | 0  | 52 |               |    |     | 0 | R.LAEQAER.Y                                                                              |
|                                                                      | 128 - 138 | 634.7827(2+)  | 0  | 70 |               |    |     | 0 | R.YLAEVACGDDR.K                                                                          |

The accession numbers of proteins in the NCBI database: TPM1, gi|78000192]; TPM2, gi|66730475]; TPM3, gi|149751320]; TPM4, gi|47894398]; 14-3-3 beta, gi|3065925]; 14-3-3 gamma, gi|3065929]; 14-3-3 epsilon, gi|5803225]; 14-3-3 zeta, gi|1526539]; 14-3-3 eta, gi|6756037]; 14-3-3 theta, gi|6756039].

**Table S5. MS/MS Identification of the 4+ Charged Peptides in Two Sets of Protein Isoforms**

| Protein       | Peptide      | Scan of 4+<br>m/z (Obs.) | Mr(Expt)      | Mr(Calc)  | ppm       | Score | Miss              | Sequence                           |
|---------------|--------------|--------------------------|---------------|-----------|-----------|-------|-------------------|------------------------------------|
| TPM1          | 91-105       | 471.7540(4+)             | 1882.9847     | 1882.9860 | -1        | 33    | 2                 | R.RIQLVEEELDRAQER.L, lysine-free   |
|               | 106-125      | 565.3027(4+)             | 2257.1795     | 2257.1802 | 0         | 65    | 2                 | R.LATALQKLEEAEEKAADESER.G          |
|               |              | 568.3215(4+)             | 2269.2547     | 2269.2555 | 0         | 72    | 2                 | 2Dimethyl (K7, K13)                |
|               |              | 827.6861(4+)             | 3306.7131     | 3306.7130 | 0         | 60    | 4                 | R.AQKDEEKMEIQEIQLEAKKHIAEDADR.K    |
|               | 134-160      | 833.7235(4+)             | 3330.8627     | 3330.8635 | 0         | 57    | 4                 | 4Dimethyl (K3, K7,K16,K19)         |
|               |              | 700.1324(4+)             | 2796.4983     | 2796.4981 | 0         | 38    | 3                 | R.KLVIIESDLERAEEERAEELSEGQVR.Q     |
| 701.6418(4+)  |              | 2802.5359                | 2802.5358     | 0         | 34        | 3     | Dimethyl (K1)     |                                    |
| TPM2          | 21-35        | 411.9604(4+)             | 1643.8126     | 1643.8114 | 1         | 29    | 2                 | R.AEQAEADKKQAEDR.C                 |
|               |              | 414.9790(4+)             | 1655.8847     | 1655.8867 | -1        | 25    | 2                 | 2Dimethyl (K8, K9)                 |
|               | 91-105       | 471.7540(4+)             | 1882.9847     | 1882.9860 | -1        | 33    | 2                 | R.RIQLVEEELDRAQER.L, lysine-free   |
|               | 106-125      | 565.3027(4+)             | 2257.1795     | 2257.1802 | 0         | 65    | 2                 | R.LATALQKLEEAEEKAADESER.G          |
|               |              | 568.3215(4+)             | 2269.2547     | 2269.2555 | 0         | 72    | 2                 | 2Dimethyl (K7, K13)                |
|               | 134-160      | 836.9194(4+)             | 3343.6463     | 3343.6463 | 0         | 58    | 4                 | R.AMKDEEKMELQEMQLKEAKKHIAESDR.K    |
|               |              | 843.2075(4+)             | 3367.7987     | 3367.7969 | 1         | 44    | 4                 | 4Dimethyl (K3, K7,K16,K19)         |
|               | 106-133      | 804.1848(4+)             | 3212.7079     | 3212.7075 | 0         | 51    | 4                 | R.LATALQKLEEAEEKAADESERGMKVNIENR.A |
|               |              | 808.7131(4+)             | 3230.8211     | 3230.8205 | 0         | 53    | 4                 | 3Dimethyl (K7,K13, K23 )           |
|               |              | 245-284                  | 1148.6117(4+) | 4590.4155 | 4590.4168 | 0     | 39                | 3                                  |
| TPM3          | 13-30        | 1153.1405(4+)            | 4608.5307     | 4608.5298 | 0         | 36    | 3                 | ELNNL.- 3 Dimethyl (K4, K7, K20)   |
|               |              | 539.5335(4+)             | 2154.1027     | 2154.1029 | 0         | 51    | 2                 | R.KIQVLQQADDAEERAER.L              |
|               | 541.0429(4+) | 2160.1403                | 2160.1406     | 0         | 28        | 2     | Dimethyl (K1)     |                                    |
|               | 55-69        | 471.7540(4+)             | 1882.9847     | 1882.9860 | -1        | 33    | 2                 | R.RIQLVEEELDRAQER.L , lysine-free  |
|               | 70-89        | 565.3027(4+)             | 2257.1795     | 2257.1802 | 0         | 65    | 2                 | R.LATALQKLEEAEEKAADESER.G          |
|               |              | 568.3215(4+)             | 2269.2547     | 2269.2555 | 0         | 72    | 2                 | 2Dimethyl (K7, K13)                |
|               | 70-97        | 804.1848(4+)             | 3212.7079     | 3212.7075 | 0         | 51    | 4                 | R.LATALQKLEEAEEKAADESERGMKVNIENR.A |
|               |              | 808.7131(4+)             | 3230.8211     | 3230.8205 | 0         | 53    | 4                 | 3Dimethyl (K7,K13, K23 )           |
|               |              | 98-124                   | 827.4469(4+)  | 3305.7563 | 3305.7542 | 1     | 62                | 4                                  |
|               | TPM4         | 13-33                    | 833.4835(4+)  | 3329.9027 | 3329.9048 | -1    | 55                | 4                                  |
| 603.3168(4+)  |              |                          | 2409.2359     | 2409.2360 | 0         | 64    | 2                 | R.KIQALQQADDAEDRAQGLQR.E           |
| 604.8263 (4+) |              | 2415.2739                | 2415.3237     | 0         | 51        | 2     | Dimethyl (K1)     |                                    |
| 34-54         |              | 604.0601(4+)             | 2412.2091     | 2412.2105 | -1        | 28    | 4                 | R.ELDGERERREKAEGDAAALNR.R          |
|               |              | 605.5698(4+)             | 2418.2479     | 2418.2482 | 0         | 21    | 4                 | Dimethyl (K11)                     |
| 43-55         | 357.9444(4+) | 1427.7463                | 1427.7481     | -1        | 29        | 2     | R.EKAEGDAAALNRR.I |                                    |

|         |         |               |           |           |    |    |   |                                          |
|---------|---------|---------------|-----------|-----------|----|----|---|------------------------------------------|
|         |         | 359.4542 (4+) | 1433.7876 | 1433.7857 | 1  | 30 | 2 | Dimethyl (K2)                            |
|         | 66-89   | 668.8315(4+)  | 2671.2947 | 2671.2937 | 0  | 75 | 1 | R.AQEQLATALQNLEEAEKAADESER.G             |
|         |         | 670.3406(4+)  | 2677.3311 | 2677.3313 | 0  | 69 | 1 | Dimethyl (K17)                           |
|         | 98-124  | 836.6796(4+)  | 3342.6871 | 3342.6874 | 0  | 42 | 4 | R.AMKDEEKMEILEMQLKEAKHITDEADR.K          |
|         |         | 842.7168(4+)  | 3366.8359 | 3366.8379 | -1 | 46 | 4 | 4Dimethyl (K3, K7,K16,K19)               |
|         | 132-142 | 339.2267(4+)  | 1352.8775 | 1352.8755 | 2  | 30 | 2 | R.KLVILEGELKR.A                          |
|         |         | 342.2451(4+)  | 1364.9511 | 1364.9508 | 0  | 42 | 2 | 2 Dimethyl (K1, K10)                     |
|         | 209-248 | 1173.8730(4+) | 4691.4607 | 4691.4580 | 0  | 34 | 4 | R.TVSKLEKTIDDLEEKLAQAKEENVGLHQTLDQTL     |
|         |         | 1179.9120(4+) | 4715.6167 | 4715.6086 | 1  | 38 | 4 | NELNCI.- 4 Dimethyl (K4, K7, K15, K20)   |
| 14-3-3  | 21-43   | 656.5502(4+)  | 2622.1695 | 2622.1690 | 0  | 32 | 1 | R.YDDMAAAMKAVTEQGHLSNEER.N               |
| beta    |         | 658.0601(4+)  | 2628.2091 | 2628.2066 | 1  | 35 | 1 | Dimethyl (K9)                            |
| 14-3-3  | 20-42   | 667.8126(4+)  | 2667.2191 | 2667.2156 | 1  | 53 | 1 | R.YDDMAAAMKNVTELNEPLSNEER.N              |
| gamma   |         | 669.3217(4+)  | 2673.2555 | 2673.2532 | 1  | 67 | 1 | Dimethyl (K9)                            |
|         | 62-83   | 637.3524(4+)  | 2545.3783 | 2545.3786 | 0  | 25 | 3 | R.VISSIEQKTSADGNEKKIEMVR.A               |
|         |         | 641.8803(4+)  | 2563.4899 | 2563.4916 | 1  | 35 | 3 | 3 Dimethyl (K8, K16, K17)                |
|         | 144-172 | 837.6726(4+)  | 3346.6591 | 3346.6616 | 1  | 51 | 2 | R.ATVVESSEKAYSEAHEISKHEMQPTHPIR.L        |
|         |         | 840.6910(4+)  | 3358.7327 | 3358.7369 | -1 | 57 | 2 | 2Dimethyl (K9, K19)                      |
| 14-3-3  | 20-42   | 686.8361(4+)  | 2743.3131 | 2743.3119 | 0  | 36 | 2 | R.YDEMVESMKKVAGMDVELTVEER.N              |
| epsilon |         | 689.8549(4+)  | 2755.3904 | 2755.3871 | 1  | 24 | 2 | 2Dimethyl(K9, K10)                       |
|         | 62-83   | 665.1290(4+)  | 2656.4847 | 2656.4834 | 1  | 30 | 4 | R.IISSIEQKEENKGGEDKMKMIR.E               |
|         |         | 671.1666(4+)  | 2680.6351 | 2680.6340 | 0  | 22 | 4 | 4Dimethyl (K8, K12, K17, K19)            |
|         | 142-170 | 795.6746(4+)  | 3178.6671 | 3178.6696 | -1 | 64 | 2 | R.KAAENSLVAYKAASDIAMTELPPTHPIR.L         |
|         |         | 798.6937(4+)  | 3190.7435 | 3190.7449 | 0  | 68 | 2 | 2Dimethyl (K1, K12)                      |
|         | 194-225 | 907.4786(4+)  | 3625.8831 | 3625.8801 | 1  | 61 | 2 | R.LAKAAFDDAIAELDTLSEESYKDSTLIMQLLR.D     |
|         |         | 910.4963(4+)  | 3637.9539 | 3637.9554 | 0  | 71 | 2 | 2 Dimethyl (K3, K22)                     |
| 14-3-3  | 19-41   | 666.2916(4+)  | 2661.1351 | 2661.1356 | 0  | 91 | 1 | R.YDDMAACMKSVTEQGAELSNEER.N              |
| zeta    |         | 667.8020(4+)  | 2667.1767 | 2667.1733 | 1  | 85 | 1 | Dimethyl (K9)                            |
|         | 61-80   | 583.5735(4+)  | 2330.2627 | 2330.2628 | 0  | 74 | 3 | R.VVSSIEQKTEGAEKKQQMAR.E                 |
|         |         | 588.1014(4+)  | 2348.3743 | 2348.3758 | -1 | 68 | 3 | 3Dimethyl (K8, K14, K15)                 |
|         | 128-167 | 1158.6002(4+) | 4630.3695 | 4630.3742 | -1 | 75 | 4 | R.YLAEVAAGDDKKGIVDQSQQAYQEAFEISKEM       |
|         |         | 1164.6389(4+) | 4654.5243 | 4654.5248 | 0  | 69 | 4 | QPTHPIR.L 4Dimethyl (K11, K12, K30, K31) |
| 14-3-3  | 20-42   | 657.5547(4+)  | 2626.1875 | 2626.1891 | -1 | 42 | 1 | R.YDDMASAMKAVTELNEPLSNEDR.N              |
| eta     |         | 659.0630(4+)  | 2632.2207 | 2632.2268 | 2  | 32 | 1 | Dimethyl (K9)                            |
| 14-3-3  | 19-41   | 669.7946(4+)  | 2675.1471 | 2675.1512 | -2 | 67 | 1 | R.YDDMATCMKAVTEQGAELSNEER.N              |
| theta   |         | 671.3025(4+)  | 2681.1787 | 2681.1889 | 4  | 64 | 1 | Dimethyl(K9)                             |

**Table S6. MS/MS Measurements of Peptide ions by Scanning Top Eight Ions and Fixed-charge Ions**

| Protein            | Number of peptide ions<br>top eight ion scans <sup>a</sup> |    |    |          | Number of peptide ions<br>fixed-charge ion scans <sup>b</sup> |    |    |          | Overlapped<br>peptide ions <sup>c</sup> | Increased<br>Peptide ions |
|--------------------|------------------------------------------------------------|----|----|----------|---------------------------------------------------------------|----|----|----------|-----------------------------------------|---------------------------|
|                    | 2+                                                         | 3+ | 4+ | subtotal | 2+                                                            | 3+ | 4+ | subtotal | Percentage                              | Percentage                |
| nuclear fraction   |                                                            |    |    |          |                                                               |    |    |          |                                         |                           |
| TPM1               | 10                                                         | 5  | 3  | 18       | 15                                                            | 12 | 6  | 33       | 55%                                     | 183%                      |
| TPM2               | 9                                                          | 7  | 0  | 16       | 15                                                            | 11 | 2  | 28       | 57%                                     | 175%                      |
| TPM3               | 11                                                         | 8  | 1  | 20       | 16                                                            | 14 | 4  | 34       | 59%                                     | 170%                      |
| TPM4               | 7                                                          | 7  | 2  | 16       | 16                                                            | 10 | 4  | 30       | 53%                                     | 188%                      |
| 14-3-3 beta        | 2                                                          | 3  | 1  | 6        | 5                                                             | 4  | 2  | 11       | 55%                                     | 183%                      |
| 14-3-3 gamma       | 4                                                          | 8  | 1  | 13       | 8                                                             | 10 | 4  | 22       | 59%                                     | 169%                      |
| 14-3-3 epsilon     | 3                                                          | 4  | 3  | 10       | 5                                                             | 4  | 4  | 13       | 77%                                     | 130%                      |
| 14-3-3 zeta        | 3                                                          | 5  | 3  | 11       | 5                                                             | 6  | 6  | 17       | 65%                                     | 155%                      |
| 14-3-3 eta         | 3                                                          | 3  | 0  | 6        | 4                                                             | 4  | 0  | 8        | 75%                                     | 133%                      |
| 14-3-3 theta       | 2                                                          | 5  | 0  | 7        | 4                                                             | 4  | 0  | 8        | 87%                                     | 114%                      |
| cytosolic fraction |                                                            |    |    |          |                                                               |    |    |          |                                         |                           |
| TPM1               | 11                                                         | 8  | 3  | 22       | 15                                                            | 12 | 8  | 35       | 63%                                     | 159%                      |
| TPM2               | 11                                                         | 10 | 0  | 21       | 15                                                            | 12 | 12 | 39       | 54%                                     | 186%                      |
| TPM3               | 16                                                         | 9  | 2  | 27       | 17                                                            | 14 | 10 | 41       | 66%                                     | 152%                      |
| TPM4               | 12                                                         | 11 | 5  | 28       | 20                                                            | 16 | 14 | 50       | 56%                                     | 179%                      |
| 14-3-3 beta        | 3                                                          | 4  | 1  | 8        | 5                                                             | 6  | 2  | 13       | 62%                                     | 163%                      |
| 14-3-3 gamma       | 6                                                          | 8  | 1  | 15       | 8                                                             | 10 | 6  | 24       | 63%                                     | 160%                      |
| 14-3-3 epsilon     | 3                                                          | 4  | 2  | 9        | 5                                                             | 10 | 8  | 23       | 39%                                     | 256%                      |
| 14-3-3 zeta        | 5                                                          | 6  | 3  | 14       | 7                                                             | 8  | 6  | 21       | 67%                                     | 150%                      |
| 14-3-3 eta         | 3                                                          | 3  | 1  | 7        | 5                                                             | 4  | 2  | 11       | 64%                                     | 157%                      |
| 14-3-3 theta       | 2                                                          | 3  | 0  | 5        | 6                                                             | 6  | 2  | 14       | 36%                                     | 280%                      |

a. Data dependent MS/MS scan of top 8 ions was performed on the nuclear and cytosolic fractions, and the peptide ions were identified by Mascot database search. No redundant ions were counted.

b. Fixed-charged ion scans were conducted by the designed charge state of 2+, 3+, or 4+ of peptides on the nuclear and cytosolic fractions, and all identified peptide ions were collected in each case. As well, no redundant ions were counted.

c. Percentage overlap refers to the ratio of total peptide ion numbers of top 8 MS/MS scans to those of the fixed-charge MS/MS scans.



**Table S7. Quantitative Details of Mouse Protein Isoforms and the Closely Related Species**

| Accession number | Protein name     | Mass (kDa) | Examples of unique dimethyl peptides        | H/L (nuclear) | H/L (cytosol) |
|------------------|------------------|------------|---------------------------------------------|---------------|---------------|
| gi 78000192      | TPM1, alpha      | 32.8       | R.AEQA-EADKKAEDR.S; R.KLVIIESDLER.A         | 0.98±0.07     | 0.95±0.03     |
| gi 66730475      | TPM2, beta       | 32.9       | R.AEQA-EADKKQAE DR.C; R.KLVILEGELER.S       | 0.72±0.03     | 0.71±0.04     |
| gi 149751320     | TPM3, gamma      | 29.0       | R.KIQVLQQQADDAEER.A; R.KLVIIEGDLER.T        | 0.72±0.06     | 0.70±0.07     |
| gi 47894398      | TPM4             | 28.5       | R.KIQALQQQADDAEDR.A; R.KLVILEGELKR.A        | 1.11±0.09     | 1.16±0.06     |
| gi 3065925       | 14-3-3, beta     | 28.1       | R.YDDMAAMKAVTEQGH ELSNEERNLLSVAYKNVVGAR.R   | 0.56±0.04     | 0.58±0.05     |
| gi 3065929       | 14-3-3, gamma    | 28.4       | R.YDDMAAMKNVTE LNEPLSNEERNLLSVAYKNVVGAR.R   | 1.01±0.16     | 0.90±0.11     |
| gi 5803225       | 14-3-3, epsilon  | 29.1       | R.YDEMVESMKKVAGMDVELTVEERNLLSVAYKNVIGAR.R   | 1.09±0.05     | 1.05±0.05     |
| gi 1526539       | 14-3-3, zeta     | 27.8       | R.YDDMAACMKSVTEQGAELSNEERNLLSVAYKNVVGAR.R   | 0.80±0.08     | 0.62±0.06     |
| gi 1526541       | 14-3-3, eta      | 28.2       | R.YDDMASAMKAVTE LNEPLSNEDRNLLSVAYKNVVGAR.R  | 1.21±0.12     | 1.08±0.09     |
| gi 6756039       | 14-3-3, theta    | 27.8       | R.YDDMATCMKAVTEQGAELSNEERNLLSVAYKNVVGGR.R   | 1.01±0.03     | 0.97±0.06     |
| gi 387090        | actin, alpha     | 41.8       | R.VAPEEHPTLLTEAPLNPKANR.E                   | 1.21±0.12     | 0.90±0.13     |
| gi 187951999     | actin, beta      | 41.7       | R.VAPEEHPVLLTEAPLNPKANR.E                   | 1.03±0.07     | 0.93±0.08     |
| gi 809561        | actin, gamma     | 41.2       | R.VAPEEHPVLLTEAPLNPKANR.E                   | 1.03±0.07     | 0.93±0.08     |
| gi 61097906      | actinin, alpha 1 | 103.1      | R.VPENTMHAMQQKLEDFR.D; R.DAKGISQEQMNEFR.A   | 1.07±0.05     | 1.32±0.20     |
| gi 11230802      | actinin, alpha 4 | 105.0      | R.VPQKTIQEMQQKLEDFR.D; R.DAKGISQEQMQEFR.A   | 1.10±0.02     | 1.12±0.15     |
| gi 435585        | myosin, Lc3      | 15.8       | K.NKAQGT YEDYVEGLR.V; R.VFDKEGNGTVMGAEIR.H  | 0.59±0.06     | 1.33±0.14     |
| gi 31981605      | myosin, Lc4      | 21.3       | R.NKEQGT YEDFVEGLR.V; R.VFDKESNGTVMGAE LR.H | 0.59±0.05     | 1.43±0.16     |
| gi 33620739      | myosin, Lc6      | 17.0       | K.NKDQGT YEDYVEGLR.V; R.VFDKEGNGTVMGAE IR.H | 0.59±0.05     | 1.32±0.06     |
| gi 71037403      | myosin, Lc, B    | 20.3       | R.EAPIDKKGNFN YIEFTR.I                      | 0.42±0.06     | -             |
| gi 9886714       | myosin, Hc IIX   | 54.6       | K.QIQKLEAR.V                                | 1.10±0.09     | -             |
| gi 17978023      | myosin, Hc II-A  | 227.4      | R.ALEEAMEQKAE LER.L                         | 0.92±0.04     | -             |
| gi 6755714       | transgelin 1     | 22.6       | R.DFTDSQLQEGKHVIGLQMG SNR.G                 | 2.08±0.06     | 1.50±0.16     |
| gi 30519911      | transgelin 2     | 22.6       | R.NFSDNQLQEGKNVIGLQMG TNR.G                 | 1.94±0.05     | 1.61±0.05     |

|              |                   |       |                                              |           |           |
|--------------|-------------------|-------|----------------------------------------------|-----------|-----------|
| gi 122939192 | clathrin, Lca     | 24.0  | R.EEQTERLEALDANSR.; R.SVLISLKQAPLVH.-        | 1.06±0.02 | 0.97±0.07 |
| gi 30794164  | clathrin, Lcb     | 23.7  | R.EEQKKRLQELDAASKVTEQEW.R; R.SVLMCLKQTPLSR.- | 0.65±0.04 | 0.71±0.05 |
| gi 51491845  | clathrin, Hc      | 193.2 | R.AHIAQLCEKAGLLQR.A; R.NLQNLLILTAIKADR.T     | -         | 0.95±0.06 |
| gi 6754976   | peroxiredoxin 1   | 22.9  | R.GLFIIDDKGILR.Q                             | 0.92±0.08 | 1.04±0.11 |
| gi 148747558 | peroxiredoxin 2   | 21.9  | R.GLFIIDAKGVL.R.Q                            | 0.96±0.04 | 0.98±0.03 |
| gi 7948999   | peroxiredoxin 4   | 31.3  | R.GLFIIDDKGVL.R.Q                            | 1.06±0.05 | -         |
| gi 6644338   | peroxiredoxin 5   | 22.7  | R.LLADPTGAFGKATDLLLLDDSLVSLFGNR.R            | 1.18±0.08 | 1.20±0.10 |
| gi 6671549   | peroxiredoxin 6   | 25.4  | R.DLAILLGMLDPVEKDANNMPVTAR.V                 | 1.12±0.02 | 1.01±0.05 |
| gi 85060507  | hnRNP, A1         | 34.8  | R.DYFEQYQKIEVIEIMTDR.G                       | 2.00±0.16 | -         |
| gi 6754222   | hnRNP, A/B        | 30.9  | R.EYFGQFGEIEAIELPIDPKLNKR.R                  | 1.67±0.12 | -         |
| gi 3329498   | hnRNP, A2/B1      | 36.0  | R.DYFEEYQKIDTIEIITDR.Q                       | 0.95±0.06 | -         |
| gi 116256514 | hnRNP, D          | 33.8  | R.EYFGGFGEVESIELPMDNKTNKR.R                  | 1.11±0.10 | -         |
| gi 19527048  | hnRNP, F*         | 46.5  | R.YIEVFKSSQEEVR.S                            | 0.97±0.17 | 1.02±0.12 |
| gi 10946928  | hnRNP, H*         | 49.9  | R.YIEIFKSSR.A                                | 1.70±0.04 | -         |
| gi 13384620  | hnRNP, K*         | 51.8  | R.VVLIGGKPD.R.V                              | 1.89±0.02 | 6.11±0.21 |
| gi 3329496   | hnRNP, U*         | 90.5  | R.GYFEYIEENKYSR.A                            | 1.02±0.07 | 4.72±0.55 |
| gi 6754208   | Hmg B1            | 26.3  | M.GKGDPPKPRGKMSSYAFFVQTCR.E                  | 1.60±0.08 | -         |
| gi 6680229   | Hmg B2            | 25.4  | M.GKGDPPKPRGKMSSYAFFVQTCR.E                  | 2.09±0.04 | -         |
| gi 6680231   | Hmg B3            | 24.3  | M.AKGDPPKPKGKMSAYAFFVQTCR.E                  | 2.14±0.09 | -         |
| gi 53733821  | tubulin, alpha 1A | 51.3  | R.TIQFVDWCPTGFKVGINYPPTVVPGGDLAKVQR.A        | -         | 0.51±0.04 |
| gi 34740335  | tubulin, alpha 1B | 50.8  | R.SIQFVDWCPTGFKVGINYPPTVVPGGDLAKVQR.A        | -         | 0.51±0.06 |
| gi 91855     | tubulin, beta 1   | 51.2  | R.ISVYYNEAYGKKYVPR.A                         | -         | 0.63±0.07 |
| gi 4507729   | tubulin, beta 2   | 50.3  | R.INVYYNEAAGNKYVPR.A                         | -         | 0.25±0.05 |
| gi 13542680  | tubulin, beta 2C  | 50.2  | R.INVYYNEATGGKYVPR.A                         | -         | 0.57±0.14 |
| gi 12963615  | tubulin, beta 3   | 50.8  | R.ISVYYNEASSHKYVPR.A                         | -         | 0.64±0.07 |
| gi 7106439   | tubulin, beta 5   | 50.1  | R.ISVYYNEATGGKYVPR.A                         | -         | 0.70±0.01 |
| gi 27754056  | tubulin, beta 6   | 50.5  | R.ISVYYNESSSKKYVPR.A                         | -         | 0.86±0.09 |
| gi 124517663 | annexin A1        | 39.0  | R.KALLALAKGDR.C                              | -         | 0.39±0.03 |
| gi 6996913   | annexin A2        | 38.9  | R.KLMVALAKGR.R                               | 1.66±0.15 | 0.65±0.01 |
| gi 148688409 | annexin A3        | 36.6  | R.KALLTLADGR.R                               | -         | 1.00±0.02 |
| gi 161016799 | annexin A4        | 36.8  | R.SKPSYFAER.L; R.KVLLVLCGGDD.-               | -         | 0.36±0.01 |
| gi 6753060   | annexin A5        | 35.8  | R.QEIAQEFKTLFGR.D                            | -         | 0.93±0.06 |

|              |                     |       |                                     |           |           |
|--------------|---------------------|-------|-------------------------------------|-----------|-----------|
| gi 31981302  | annexin A6          | 77.8  | R.SKQHLR.L                          | -         | 1.68±0.05 |
| gi 14290464  | annexin A7          | 50.6  | R.KLLLAIVGQ.-                       | -         | 1.30±0.09 |
| gi 5902076   | Sfrs 1              | 28.1  | R.DIDLKNR.R                         | 1.28±0.03 | 1.36±0.20 |
| gi 6755478   | Sfrs 2              | 25.8  | R.RVFEKYGR.V                        | 1.02±0.11 | 0.90±0.10 |
| gi 4506901   | Sfrs 3              | 19.7  | R.VELSNGEKR.S                       | 0.88±0.05 | -         |
| gi 122890231 | Sfrs 4              | 58.1  | R.SVSKER.E                          | 0.85±0.14 | -         |
| gi 119226243 | Sfrs 5              | 31.5  | R.IRDIDLKR.G                        | 0.99±0.12 | -         |
| gi 15080592  | Sfrs 6              | 39.8  | R.SPKENGKGDIKSKSR.S                 | 1.27±0.18 | -         |
| gi 22122585  | Sfrs 7              | 27.8  | R.GLDGKVICGSR.V                     | 1.88±0.04 | -         |
| gi 56269656  | Sfrs10              | 27.0  | R.EVFSKYGPIADVSIVYDQQSR.R           | 1.01±0.15 | -         |
| gi 23956214  | Sfpg                | 76.4  | R.LFVGNLPADITEDEFKR.L               | 2.10±0.16 | -         |
| gi 21450341  | Nedd8-activating E1 | 61.6  | R.LDKPFPELR.E                       | -         | 1.08±0.12 |
| gi 6678483   | UBA1                | 120.4 | R.SPSPVKQNSLDEDLIR.K                | -         | 1.90±0.19 |
| gi 7709986   | UBA2                | 72.5  | R.TIFLNKQPNPR.K                     | -         | 1.20±0.09 |
| gi 13384768  | Ufm1                | 20.0  | R.LKEEYQSLIR.Y                      | -         | 1.49±0.04 |
| gi 4507773   | UBE2D 1             | 17.1  | R.IQKELSDLQR.D                      | -         | 4.35±0.16 |
| gi 4507777   | UBE2D 3             | 17.1  | R.INKELSDLAR.D                      | 1.81±0.14 | 2.03±0.11 |
| gi 4507789   | UBE2L 3             | 18.0  | R.ADLAEEYSKDR.K                     | 1.10±0.07 | 1.11±0.13 |
| gi 4507793   | UBE2N               | 17.4  | R.LLAEPVPGIKAEPDESNAR.Y             | 1.32±0.08 | 1.37±0.21 |
| gi 33391146  | UBR2                | 205.1 | K.KNLMTVIIK.A                       | -         | 0.90±0.13 |
| gi 1374782   | Nedd4               | 111.8 | R.ADLLKAR.L                         | -         | 0.96±0.04 |
| gi 51895883  | Nedd4l              | 103.2 | R.ELALVQTKTIK.K                     | -         | 0.75±0.03 |
| gi 33563282  | Psm1                | 30.1  | R.LVSLIGSKTQIPTQR.Y                 | 1.09±0.08 | 0.95±0.12 |
| gi 8394063   | Psm2                | 26.4  | R.KLAQQYYLVYQEPIPTAQLVQR.V          | 1.01±0.09 | 1.14±0.05 |
| gi 148704618 | Psm3                | 26.1  | R.HEIVPKDIREEAKEYAKESLKEEDESDDDNM.- | 0.86±0.04 | 0.83±0.07 |
| gi 6755196   | Psm4                | 30.4  | R.EKKEKEQR.E                        | -         | 1.11±0.10 |
| gi 6755198   | Psm6                | 27.8  | R.LYQVEYAFKAINQGGLTSVAVR.G          | -         | 0.97±0.05 |
| gi 148675357 | Psm7                | 25.7  | R.YIASLKQRRLYQTDPSGTYHAWKANAIGR.G   | -         | 0.91±0.06 |
| gi 7242197   | Psm1                | 26.9  | R.ICIVTKEGIR.E                      | 0.95±0.07 | 0.87±0.05 |
| gi 227116345 | Psm2                | 23.4  | R.VIDKDGIHNLLENIAFPKRDS.-           | 0.99±0.06 | -         |
| gi 6755202   | Psm3                | 23.6  | R.LNLYELKEGRQIKPYTLMSMVANLLYEKR.F   | 1.10±0.04 | 0.91±0.08 |
| gi 14198355  | Psm4                | 29.4  | R.EVLEKQPVLSQTEAR.E                 | 0.91±0.09 | 1.13±0.03 |
| gi 238231384 | Psm6                | 25.7  | R.QVLLGDQIPKFTIATLPPP.-             | -         | 0.99±0.07 |

|              |                  |       |                                     |           |           |
|--------------|------------------|-------|-------------------------------------|-----------|-----------|
| gi 6679501   | Psmc1            | 50.6  | R.LKLLKLER.I                        | -         | 1.76±0.16 |
| gi 33859604  | Psmc2            | 54.3  | R.KIEFSLPDLEGR.T                    | -         | 1.23±0.12 |
| gi 123226008 | Psmc3            | 45.7  | R.KMNVSPDVNYEELAR.C                 | -         | 1.53±0.07 |
| gi 25742677  | Psmc4            | 48.3  | R.VVGSEFVQKYLGEPR.M                 | -         | 1.24±0.05 |
| gi 7110703   | Psmc5            | 46.7  | R.VSGSELVQKFIGEGAR.M                | -         | 1.83±0.08 |
| gi 74315975  | Psmd1            | 108.7 | R.LEGIVNKMFOR.C                     | -         | 2.80±0.04 |
| gi 19882201  | Psmd2            | 102.4 | R.KNPYDL.-                          | -         | 2.05±0.08 |
| gi 19705424  | Psmd3            | 61.7  | R.IKAIQLEYSEAR.R; R.VYEFLDKLDVVR.S; | -         | 2.00±0.11 |
| gi 148676680 | Psmd5            | 37.4  | R.VGYQAKNASTELKIR.C                 | -         | 1.47±0.12 |
| gi 46049022  | Psmd6            | 46.5  | R.VQKLSR.V                          | -         | 0.93±0.06 |
| gi 6754724   | Psmd7            | 37.6  | R.DIKDTTVGTLSQR.I                   | -         | 2.21±0.10 |
| gi 31980811  | Psmd10           | 25.8  | R.ILADKSLATR.T                      | -         | 0.97±0.02 |
| gi 72679790  | Psmd11           | 48.2  | R.LVSLYFDTKR.Y                      | -         | 2.14±0.07 |
| gi 13385384  | Psmd12           | 54.4  | R.LQEVETLLSLEKQTR.T                 | -         | 1.58±0.01 |
| gi 6755210   | Psmd13           | 43.8  | R.FLGCVDIKDLPVSEQQER.A              | -         | 1.95±0.02 |
| gi 468546    | CCT 2, beta      | 58.8  | R.VDNIKAAPR.K                       | 1.31±0.05 | 1.84±0.08 |
| gi 6753320   | CCT3, gamma      | 62.1  | R.GVMINKDVTHPR.M                    | -         | 3.50±0.24 |
| gi 6753322   | CCT4, delta      | 59.6  | R.HAQGEKTTGINVR.K                   | 1.10±0.01 | 1.88±0.05 |
| gi 148666717 | CCT7, eta        | 63.1  | R.QLCDNAGFDATNILNKLR.A              | 2.05±0.18 | 1.64±0.11 |
| gi 5295992   | CCT8, theta      | 61.2  | R.NIQACKELAQTTR.T                   | 1.60±0.10 | 1.91±0.16 |
| gi 6754816   | septin 2 (Nedd5) | 42.5  | R.DCFKTIISYIDEQFER.Y                | 3.62±0.04 | -         |
| gi 5689158   | septin 6         | 49.2  | R.NEFLGELQKKEEEMR.Q                 | 2.28±0.10 | -         |
| gi 148693353 | septin 7 (CDC10) | 44.9  | R.QFEEKANWEAQQR.I                   | 2.66±0.08 | -         |
| gi 122889413 | septin 9         | 65.2  | R.RTEITIVKPQESVLR.R                 | 1.97±0.09 | -         |
| gi 31542366  | CDC2             | 34.8  | R.EISLLKELR.H                       | -         | 1.92±0.06 |
| gi 7949018   | CDC37            | 46.2  | R.KLKELEVAESDGQVELER.L              | -         | 1.70±0.05 |
| gi 149252935 | TF EF1           | 37.1  | R.NDTKEDVVFVHQTAIKKNPR.K            | 1.57±0.07 | 1.45±0.12 |
| gi 201937    | TF S-II          | 31.1  | R.KNVLCGNIPDLFAR.M                  | 1.17±0.03 | -         |
| gi 28174932  | Btf314           | 20.1  | R.KLAEQFPR.Q                        | 0.92±0.10 | 1.11±0.14 |
| gi 226051832 | Max              | 18.5  | R.AQILDKATEYIQYMR.R                 | 1.29±0.09 | -         |
| gi 60650308  | LRR 27           | 61.3  | K.KLQEELR.K                         | 0.71±0.08 | 0.52±0.05 |

|              |        |      |                       |   |           |
|--------------|--------|------|-----------------------|---|-----------|
| gi 27229082  | LZIC   | 22.1 | R.KVEILTALR.K         | - | 0.62±0.12 |
| gi 13385296  | Bzw1   | 49.4 | R.KRDEKER.F           | - | 3.01±0.36 |
| gi 18700032  | Anp32b | 31.6 | R.LDCLKSLDLFGCEVTNR.S | - | 1.47±0.15 |
| gi 254587996 | Anp32e | 30.3 | R.LPSLNKLR.K          | - | 7.64±0.00 |

14-3-3: tyrosine 3-monooxygenase/tryptophan 5-monooxygenase activation protein; hnRNP: heterogeneous nuclear ribonucleoprotein; TPM: tropomyosin; Hmg: high mobility group; Sfrs: splicing factor, arginine/serine-rich; Sfpg: splicing factor proline/glutamine rich; clathrin: light polypeptide chain (Lc), heavy polypeptide (Hc); myosin: light polypeptide chain (Lc), heavy polypeptide (Hc); CDC: cell division cycle. UBA1: ubiquitin-activating enzyme E1; UBA2: ubiquitin-like modifier activating enzyme 2; Ufm1: ubiquitin-fold modifier conjugating enzyme 1; UBE: ubiquitin-conjugating enzyme. CCT: chaperonin-containing TCP-1; Psma: proteasome (prosome, macropain) subunit, alpha type; Psmb: proteasome (prosome, macropain) subunit, beta type; Psmc: proteasome (prosome, macropain) 26S ATPase subunit; Psmc: proteasome (prosome, macropain) 26S non-ATPase subunit; TF: transcription factor. MAX: Myc associated factor X; LRR: leucine rich repeat containing protein; LZIC: leucine zipper and CTNNBIP1 domain containing; Bzw1: basic leucine zipper and W2 domain 1. Anp32: acidic (leucine-rich) nuclear phosphoprotein 32.

H/L values are calculated at the average of two independent sample preparations; “-” represents weak or undetected peaks.

**Table S8. Sequence Identity of Protein Isoform Pairs**

| Accession #  | Protein name     | Mass(kDa) | Amino acids | Identity | Accession #  | Protein name      | Mass(kDa) | Amino acids | Identity |
|--------------|------------------|-----------|-------------|----------|--------------|-------------------|-----------|-------------|----------|
| gi 78000192  | TPM1, alpha      | 32.8      | 284         |          | gi 85060507  | hnRNP, A1         | 34.8      | 373         |          |
| gi 66730475  | TPM2, beta       | 32.9      | 284         | 83.1%    | gi 3329498   | hnRNP, A2/B1      | 36.0      | 341         | 77.6%    |
| gi 149751320 | TPM3, gamma      | 29.0      | 248         |          | gi 6754222   | hnRNP, A/B        | 30.9      | 285         |          |
| gi 47894398  | TPM4             | 28.5      | 248         | 73.2%    | gi 116256514 | hnRNP, D          | 33.8      | 306         | 66.5%    |
| gi 3065925   | 14-3-3, beta     | 28.1      | 246         |          | gi 19527048  | hnRNP, F          | 46.5      | 415         |          |
| gi 3065929   | 14-3-3, gamma    | 28.4      | 247         | 75.0%    | gi 10946928  | hnRNP, H          | 49.9      | 449         | 74.6%    |
| gi 5803225   | 14-3-3, epsilon  | 29.1      | 255         |          | gi 6754208   | Hmg B1            | 26.3      | 215         |          |
| gi 1526539   | 14-3-3, zeta     | 27.8      | 245         | 68.6%    | gi 6680229   | Hmg B2            | 25.4      | 210         | 82.8%    |
| gi 1526541   | 14-3-3, eta      | 28.2      | 246         |          | gi 6680229   | Hmg B2            | 25.4      | 210         |          |
| gi 6756039   | 14-3-3, theta    | 27.8      | 245         | 71.5%    | gi 6680231   | Hmg B3            | 24.3      | 200         | 72.7%    |
| gi 1526539   | 14-3-3, zeta     | 27.8      | 245         |          | gi 53733821  | tubulin, alpha 1A | 51.3      | 451         |          |
| gi 6756039   | 14-3-3, theta    | 27.8      | 245         | 78.8%    | gi 34740335  | tubulin, alpha 1B | 50.8      | 451         | 99.3%    |
| gi 387090    | actin, alpha     | 41.8      | 375         |          | gi 91855     | tubulin, beta 1   | 51.2      | 450         |          |
| gi 187951999 | actin, beta      | 41.7      | 375         | 94.1%    | gi 4507729   | tubulin, beta 2   | 50.3      | 445         | 80.0%    |
| gi 809561    | actin, gamma     | 41.2      | 368         |          | gi 13542680  | tubulin, beta 2C  | 50.2      | 445         |          |
| gi 387090    | actin, alpha     | 41.8      | 375         | 95.1%    | gi 12963615  | tubulin, beta 3   | 50.8      | 450         | 92.8%    |
| gi 61097906  | actinin, alpha 1 | 103.1     | 892         |          | gi 12963615  | tubulin, beta 3   | 50.8      | 450         |          |
| gi 11230802  | actinin, alpha 4 | 105.0     | 912         | 86.5%    | gi 29145006  | tubulin, beta 4   | 49.6      | 444         | 93.2%    |
| gi 435585    | myosin, Lc3      | 15.8      | 141         |          | gi 7106439   | tubulin, beta 5   | 50.1      | 444         |          |
| gi 33620739  | myosin, Lc6      | 17.0      | 151         | 95.0%    | gi 27754056  | tubulin, beta 6   | 50.5      | 447         | 93.0%    |
| gi 31981605  | myosin, Lc4      | 21.3      | 193         |          | gi 124517663 | annexin A1        | 39.0      | 346         |          |
| gi 33620739  | myosin, Lc6      | 17.3      | 151         | 74.2%    | gi 6996913   | annexin A2        | 38.9      | 339         | 53.6%    |
| gi 6755714   | transgelin 1     | 22.6      | 201         |          | gi 148688409 | annexin A3        | 36.6      | 323         |          |
| gi 30519911  | transgelin 2     | 22.6      | 199         | 67.5%    | gi 161016799 | annexin A4        | 36.8      | 319         | 51.1%    |
| gi 122939192 | clathrin, Lca    | 24.0      | 218         |          | gi 161016799 | annexin A4        | 36.8      | 319         |          |
| gi 30794164  | clathrin, Lcb    | 23.7      | 211         | 62.4%    | gi 6753060   | annexin A5        | 35.8      | 319         | 56.2%    |
| gi 6754976   | peroxiredoxin 1  | 22.9      | 199         |          | gi 5902076   | Sfrs 1            | 28.1      | 248         |          |
| gi 148747558 | peroxiredoxin 2  | 21.9      | 198         | 74.4%    | gi 6755478   | Sfrs 2            | 25.8      | 221         | 56.9%    |
| gi 148669902 | peroxiredoxin 3  | 28.1      | 257         |          | gi 119226243 | Sfrs 5            | 31.5      | 269         |          |
| gi 7948999   | peroxiredoxin 4  | 31.3      | 274         | 65.0%    | gi 15080592  | Sfrs 6            | 39.8      | 339         | 64.3%    |
| gi 4507773   | UBE2D 1          | 17.1      | 147         |          | gi 5689158   | septin 6          | 49.2      | 429         |          |
| gi 4507777   | UBE2D 3          | 17.1      | 147         | 88.4%    | gi 148693353 | septin 7          | 44.9      | 384         | 43.8%    |
| gi 1374782   | Nedd4            | 111.8     | 957         |          | gi 18700032  | Anp32b            | 31.6      | 272         |          |
| gi 51895883  | Nedd4l           | 103.2     | 875         | 64.3%    | gi 254587996 | Anp32e            | 30.3      | 260         | 61.4%    |

Sequence alignment using an on-line web tool by BLAST at <http://blast.ncbi.nlm.nih.gov/Blast.cgi>
